# Supplementary material for: Reducing hippocampal extracellular matrix reverses early memory deficits in a mouse model of Alzheimer’s disease
Source: Springer Nature journal article supplement (doi:10.1186/s40478-014-0076-z), 2014-06-28
Supplement: 40478_2014_76_MOESM3_ESM.pdf [file 40478_2014_76_MOESM3_ESM.pdf]

## **Reducing hippocampal extracellular matrix reverses early memory deficits in a mouse model of Alzheimer's disease**

**Marlene J. Végh<sup>a</sup>, Céline M. Heldring<sup>a</sup>, Willem Kamphuis<sup>b</sup>, Sara Hijazi<sup>a</sup>, Arie J. Timmerman<sup>a</sup>, Ka Wan Li<sup>a</sup>, Pim van Nierop<sup>a</sup>, Huibert D. Mansvelder<sup>a</sup>, Elly M. Hol<sup>c</sup>, August B. Smit<sup>a</sup>, Ronald E. van Kesteren<sup>a</sup>**

<sup>a</sup>Center for Neurogenomics and Cognitive Research, Neuroscience Campus Amsterdam, VU University, De Boelelaan 1085, 1081 HV Amsterdam, The Netherlands.

<sup>b</sup>Netherlands Institute for Neuroscience, Meibergdreef 47, 1105 BA Amsterdam, The Netherlands.

<sup>c</sup>Department of Translational Neuroscience, Brain Center Rudolf Magnus, University Medical Center Utrecht, Universiteitsweg 100, 3584 CG, Utrecht, The Netherlands.

Correspondence should be addressed to R.E. van Kesteren. E-mail: ronald.van.kesteren@vu.nl, phone: +31205987111, fax: +31205989281.

### **Supplementary Table 1**

Suppl. Table 1 List of all quantified proteins

| ID           | Gene symbol | Description                                                         | Log-fold change<br>1.5 months<br>TG:WT | Log-fold change<br>3 months<br>TG:WT | Log-fold change<br>6 months<br>TG:WT | Log-fold change<br>12 months<br>TG:WT | STDEV<br>1.5 months | STDEV<br>3 months | STDEV<br>6 months | STDEV<br>12 months | SAM FDR %  |          |          |           | t-test     |          |          |           | Number of quantified proteins Set |    |    |    |    |
|--------------|-------------|---------------------------------------------------------------------|----------------------------------------|--------------------------------------|--------------------------------------|---------------------------------------|---------------------|-------------------|-------------------|--------------------|------------|----------|----------|-----------|------------|----------|----------|-----------|-----------------------------------|----|----|----|----|
|              |             |                                                                     |                                        |                                      |                                      |                                       |                     |                   |                   |                    | 1.5 months | 3 months | 6 months | 12 months | 1.5 months | 3 months | 6 months | 12 months | 1                                 | 2  | 3  | 4  | 5  |
| THIL_MOUSE   | ACAT1       | Acetyl-CoA acetyltransferase                                        | 0.128                                  | -0.024                               | 0.007                                | -0.012                                | 0.049               | 0.081             | 0.080             | 0.079              | 25.67      | >100.00  | 84.08    | >100.00   | 0.031      | 0.779    | 0.832    | 0.883     | 4                                 | 6  | 5  | 4  | 5  |
| ACON_MOUSE   | AC02        | Aconitate hydratase                                                 | 0.020                                  | -0.093                               | -0.131                               | 0.045                                 | 0.041               | 0.072             | 0.159             | 0.087              | 73.92      | 40.16    | 54.74    | 52.69     | 0.635      | 0.246    | 0.501    | 0.621     | 12                                | 15 | 14 | 12 | 14 |
| ACSL6_MOUSE  | ACSL6       | Long-chain-fatty-acyl-CoA ligase 6                                  | 0.078                                  | 0.020                                | 0.078                                | -0.126                                | 0.077               | 0.084             | 0.130             | 0.101              | 51.06      | >100.00  | 77.57    | 56.85     | 0.360      | 0.821    | 0.580    | 0.252     | 2                                 | 7  | 6  | 4  | 2  |
| ACTC_MOUSE   | ACTC        | Actin, alpha cardiac muscle 1                                       | -0.107                                 | -0.192                               | -0.117                               | 0.152                                 | 0.092               | 0.071             | 0.243             | 0.176              | 53.37      | 5.18     | 70.10    | 42.52     | 0.278      | 0.044    | 0.632    | 0.419     | 13                                | 13 | 10 | 11 | 11 |
| ARPF2_MOUSE  | ACTR2       | Actin-related protein 2                                             | 0.050                                  | -0.080                               | 0.033                                | -0.192                                | 0.052               | 0.047             | 0.078             | 0.080              | 54.63      | 38.47    | 84.42    | 15.09     | 0.374      | 0.129    | 0.703    | 0.048     | 6                                 | 9  | 9  | 8  | 7  |
| ARPF3_MOUSE  | ACTR3       | Actin-related protein 3                                             | 0.036                                  | -0.068                               | 0.090                                | 0.059                                 | 0.032               | 0.090             | 0.035             | 0.057              | 71.43      | 45.18    | 77.57    | 51.06     | 0.593      | 0.471    | 0.062    | 0.337     | 5                                 | 7  | 7  | 5  | 4  |
| ADAM2_MOUSE  | ADAM23      | ADAM 23                                                             | -0.186                                 | 0.220                                | 0.065                                | -0.066                                | 0.142               | 0.080             | 0.123             | 0.072              | 51.02      | 4.86     | 77.57    | 65.26     | 0.253      | 0.026    | 0.622    | 0.397     | 2                                 | 3  | 3  | 4  | 1  |
| SAHH2_MOUSE  | AHCYL1      | Putative adenylosuccinylase 2                                       | -0.185                                 | 0.042                                | -0.056                               | 0.116                                 | 0.070               | 0.098             | 0.070             | 0.171              | 32.58      | 38.09    | 70.39    | 51.06     | 0.044      | 0.681    | 0.432    | 0.527     | 7                                 | 7  | 6  | 6  | 3  |
| CD166_MOUSE  | ALCAM       | CD166 antigen                                                       | -0.050                                 | -0.225                               | 0.223                                | 0.165                                 | 0.096               | 0.156             | 0.174             | 0.130              | 66.90      | 13.70    | 77.57    | 33.94     | 0.620      | 0.208    | 0.316    | 0.257     | 1                                 | 6  | 5  | 5  | 5  |
| ALDOA_MOUSE  | ALDOA       | Fructose-bisphosphate aldolase A                                    | -0.049                                 | 0.073                                | 0.163                                | -0.114                                | 0.071               | 0.058             | 0.094             | 0.095              | 66.90      | 45.18    | 77.57    | 59.68     | 0.514      | 0.246    | 0.115    | 0.272     | 15                                | 16 | 13 | 14 | 15 |
| ALDOC_MOUSE  | ALDOC       | Fructose-bisphosphate aldolase C                                    | -0.072                                 | -0.067                               | 0.020                                | 0.299                                 | 0.089               | 0.066             | 0.112             | 0.068              | 66.90      | 43.44    | 84.42    | 2.86      | 0.440      | 0.343    | 0.866    | 0.002     | 4                                 | 5  | 4  | 6  | 4  |
| AMPH_MOUSE   | AMPH        | Amphiphysin                                                         | -0.038                                 | -0.234                               | -0.229                               | -0.079                                | 0.058               | 0.064             | 0.217             | 0.149              | 66.90      | 0.00     | 48.33    | 35.25     | 0.543      | 0.017    | 0.330    | 0.609     | 6                                 | 8  | 8  | 9  | 9  |
| 148680322    | ANK2        | Ankyrin 2, brain, isoform CRA_b                                     | 0.006                                  | -0.023                               | 0.036                                | -0.021                                | 0.038               | 0.039             | 0.062             | 0.052              | 76.98      | >100.00  | 82.66    | >100.00   | 0.876      | 0.566    | 0.632    | 0.695     | 11                                | 30 | 24 | 25 | 15 |
| ANNS1B_MOUSE | ANKS1B      | Ankyrin repeat and sterile alpha motif domain-containing protein 1B | -0.001                                 | 0.098                                | 0.057                                | -0.079                                | 0.041               | 0.096             | 0.149             | 0.043              | >100.00    | >100.00  | 81.64    | 61.12     | 0.988      | 0.340    | 0.686    | 0.103     | 7                                 | 7  | 10 | 5  | 8  |
| ANXA5_MOUSE  | ANXA5       | Annexin A5                                                          | -0.121                                 | 0.213                                | -0.112                               | 0.142                                 | 0.055               | 0.091             | 0.184             | 0.120              | 36.04      | 6.84     | 65.82    | 37.40     | 0.070      | 0.047    | 0.548    | 0.299     | 3                                 | 3  | 3  | 4  | 1  |
| ANXA6_MOUSE  | ANXA6       | Annexin A6                                                          | -0.039                                 | 0.152                                | 0.055                                | 0.107                                 | 0.047               | 0.024             | 0.073             | 0.043              | 66.90      | 3.14     | 78.68    | 33.94     | 0.429      | 0.001    | 0.480    | 0.040     | 11                                | 18 | 21 | 19 | 10 |
| ANXA7_MOUSE  | ANXA7       | Annexin A7                                                          | 0.107                                  | 0.008                                | 0.014                                | 0.056                                 | 0.108               | 0.093             | 0.117             | 0.056              | 50.52      | >100.00  | 84.42    | 51.06     | 0.358      | 0.935    | 0.903    | 0.358     | 3                                 | 5  | 2  | 4  | 1  |
| AP2A1_MOUSE  | AP2A1       | AP-2 complex subunit alpha-1                                        | 0.078                                  | -0.061                               | -0.003                               | -0.043                                | 0.050               | 0.046             | 0.059             | 0.081              | 38.56      | 42.52    | >100.00  | >100.00   | 0.162      | 0.221    | 0.966    | 0.612     | 7                                 | 16 | 13 | 15 | 11 |
| AP2A2_MOUSE  | AP2A2       | AP-2 complex subunit alpha-2                                        | 0.032                                  | -0.012                               | -0.050                               | 0.090                                 | 0.041               | 0.052             | 0.068             | 0.049              | 66.90      | >100.00  | 70.13    | 42.52     | 0.465      | 0.831    | 0.520    | 0.107     | 8                                 | 13 | 13 | 12 | 13 |
| AP2B1_MOUSE  | AP2B1       | AP-2 complex subunit beta-1                                         | 0.122                                  | -0.027                               | -0.149                               | 0.148                                 | 0.029               | 0.058             | 0.118             | 0.058              | 13.12      | 40.16    | 48.33    | 27.41     | 0.005      | 0.657    | 0.228    | 0.050     | 5                                 | 6  | 6  | 5  | 6  |
| AP2M1_MOUSE  | AP2M1       | AP-2 complex subunit mu-1                                           | 0.005                                  | 0.005                                | -0.177                               | 0.143                                 | 0.058               | 0.061             | 0.055             | 0.068              | >100.00    | >100.00  | 82.61    | 82.61     | 0.005      | 0.657    | 0.228    | 0.050     | 9                                 | 14 | 11 | 12 | 10 |
| AP2S1_MOUSE  | AP2S1       | AP-2 complex subunit sigma-1                                        | -0.090                                 | 0.139                                | 0.071                                | 0.257                                 | 0.066               | 0.070             | 0.124             | 0.082              | 51.02      | 13.62    | 77.57    | 17.88     | 0.224      | 0.084    | 0.585    | 0.015     | 3                                 | 5  | 4  | 5  | 4  |
| APOE_MOUSE   | APOE        | Apolipoprotein E                                                    | -0.074                                 | 0.192                                | 0.138                                | 0.737                                 | 0.103               | 0.105             | 0.070             | 0.140              | 66.90      | 13.60    | 77.57    | 0.00      | 0.505      | 0.114    | 0.127    | 0.001     | 1                                 | 3  | 6  | 4  | 3  |
| A4_MOUSE     | APP         | Amyloid beta A4 protein                                             | 0.183                                  | 0.386                                | 0.408                                | 1.325                                 | 0.120               | 0.131             | 0.083             | 0.265              | 32.80      | 3.50     | 0.00     | 0.00      | 0.167      | 0.019    | 0.004    | 0.003     | 2                                 | 3  | 5  | 5  | 2  |
| AQP4_MOUSE   | AQP4        | Aquaporin-4                                                         | 0.062                                  | 0.107                                | 0.052                                | 0.360                                 | 0.084               | 0.092             | 0.177             | 0.138              | 59.24      | 21.11    | 81.76    | 11.39     | 0.481      | 0.278    | 0.763    | 0.043     | 4                                 | 3  | 3  | 3  | 3  |
| ARF3_MOUSE   | ARF3        | ADP-ribosylation factor 3                                           | 0.155                                  | -0.146                               | -0.270                               | 0.330                                 | 0.087               | 0.070             | 0.266             | 0.187              | 26.24      | 9.59     | 48.33    | 21.15     | 0.142      | 0.071    | 0.357    | 0.118     | 3                                 | 4  | 3  | 3  | 2  |
| ARC1A_MOUSE  | ARPC1A      | Actin-related protein 2/3 complex subunit 1A                        | -0.170                                 | 0.120                                | -0.084                               | -0.010                                | 0.102               | 0.103             | 0.098             | 0.115              | 42.55      | 21.11    | 70.88    | >100.00   | 0.160      | 0.278    | 0.389    | 0.931     | 1                                 | 5  | 4  | 4  | 2  |
| ARPC2_MOUSE  | ARPC2       | Actin-related protein 2/3 complex subunit 2                         | -0.026                                 | 0.010                                | -0.005                               | -0.062                                | 0.063               | 0.061             | 0.095             | 0.053              | 69.52      | >100.00  | >100.00  | 65.26     | 0.723      | 0.876    | 0.960    | 0.286     | 6                                 | 10 | 10 | 9  | 9  |
| ARPC3_MOUSE  | ARPC3       | Actin-related protein 2/3 complex subunit 3                         | -0.063                                 | 0.104                                | -0.046                               | -0.191                                | 0.071               | 0.072             | 0.160             | 0.154              | 62.80      | 19.86    | 73.06    | 44.46     | 0.346      | 0.186    | 0.792    | 0.251     | 2                                 | 4  | 5  | 3  | 3  |
| ARPC4_MOUSE  | ARPC4       | Actin-related protein 2/3 complex subunit 4                         | 0.017                                  | 0.081                                | 0.020                                | -0.074                                | 0.082               | 0.068             | 0.091             | 0.127              | 76.98      | 22.38    | 84.42    | 65.26     | 0.841      | 0.278    | 0.845    | 0.581     | 5                                 | 6  | 6  | 2  | 3  |
| ARPSL_MOUSE  | Arpc5l      | Actin-related protein 2/3 complex subunit 5-like protein            | -0.042                                 | -0.182                               | -0.062                               | -0.033                                | 0.063               | 0.093             | 0.141             | 0.151              | 66.90      | 9.19     | 70.02    | >100.00   | 0.535      | 0.085    | 0.680    | 0.832     | 2                                 | 3  | 4  | 5  | 1  |
| AT1A1_MOUSE  | ATP1A1      | Sodium/potassium-transporting ATPase subunit alpha-1                | -0.031                                 | -0.030                               | 0.033                                | -0.085                                | 0.056               | 0.065             | 0.106             | 0.058              | 66.90      | 28.43    | 84.42    | 61.47     | 0.592      | 0.655    | 0.791    | 0.177     | 23                                | 26 | 23 | 24 | 21 |
| AT1A2_MOUSE  | ATP1A2      | Sodium/potassium-transporting ATPase subunit alpha-2                | -0.002                                 | 0.015                                | 0.144                                | -0.003                                | 0.075               | 0.040             | 0.100             | 0.069              | 50.18      | >100.00  | 77.57    | >100.00   | 0.977      | 0.721    | 0.179    | 0.968     | 25                                | 28 | 27 | 29 | 27 |
| AT1A3_MOUSE  | ATP1A3      | Sodium/potassium-transporting ATPase subunit alpha-3                | -0.019                                 | 0.021                                | 0.130                                | 0.017                                 | 0.063               | 0.043             | 0.106             | 0.056              | 69.52      | 40.16    | 77.57    | >100.00   | 0.774      | 0.639    | 0.300    | 0.768     | 28                                | 31 | 30 | 31 | 31 |
| AT1B1_MOUSE  | ATP1B1      | Sodium/potassium-transporting ATPase subunit beta-1                 | -0.046                                 | 0.150                                | 0.207                                | 0.093                                 | 0.038               | 0.049             | 0.100             | 0.077              | 61.19      | 7.45     | 77.57    | 42.52     | 0.271      | 0.020    | 0.108    | 0.260     | 13                                | 17 | 16 | 16 | 15 |
| AT1B2_MOUSE  | ATP1B2      | Sodium/potassium-transporting ATPase subunit beta-2                 | -0.075                                 | -0.071                               | 0.144                                | -0.042                                | 0.058               | 0.035             | 0.130             | 0.078              | 53.37      | 38.86    | 77.57    | >100.00   | 0.235      | 0.081    | 0.318    | 0.601     | 7                                 | 7  | 7  | 7  | 5  |
| AT2A2_MOUSE  | ATP2A2      | Sarcoplasmic/endoplasmic reticulum calcium ATPase 2                 | 0.032                                  | 0.065                                | -0.032                               | 0.045                                 | 0.023               | 0.024             | 0.043             | 0.037              | 52.48      | 21.11    | 75.29    | 51.06     | 0.213      | 0.026    | 0.502    | 0.263     | 9                                 | 14 | 14 | 15 | 8  |
| AT2B2_MOUSE  | ATP2B2      | Plasma membrane calcium-transporting ATPase 2                       | -0.033                                 | 0.047                                | 0.125                                | -0.059                                | 0.054               | 0.040             | 0.106             | 0.055              | 66.90      | 31.23    | 77.57    | 65.26     | 0.562      | 0.279    | 0.310    | 0.321     | 10                                | 19 | 16 | 15 | 13 |
| 148697040    | ATP2B3      | ATPase, Ca++-transporting, plasma membrane 3, isoform CRA_a         | -0.011                                 | 0.066                                | 0.108                                | -0.096                                | 0.058               | 0.034             | 0.091             | 0.045              | 69.52      | 13.24    | 77.57    | 59.85     | 0.960      | 0.014    | 0.325    | 0.064     | 8                                 | 14 | 13 | 14 | 10 |
| ATP8_MOUSE   | ATP8A       | ATP synthase subunit alpha                                          | 0.198                                  | -0.144                               | -0.190                               | -0.044                                | 0.048               | 0.072             | 0.138             | 0.104              | 26.27      | 14.02    | 48.33    | >100.00   | 0.074      | 0.103    | 0.275    | 0.062     | 22                                | 27 | 27 | 28 | 22 |
| ATP8_MOUSE   | ATP8B       | ATP synthase subunit beta                                           | 0.174                                  | 0.138                                | -0.153                               | 0.095                                 | 0.108               | 0.092             | 0.132             | 0.121              | 31.49      | 19.86    | 48.33    | 51.06     | 0.149      | 0.186    | 0.344    | 0.464     | 16                                | 18 | 17 | 17 | 17 |
| ATP6_MOUSE   | ATP6C1      | ATP synthase subunit gamma                                          | 0.187                                  | -0.099                               | -0.147                               | -0.100                                | 0.082               | 0.098             | 0.088             | 0.127              | 25.67      | 41.72    | 48.33    | 65.26     | 0.055      | 0.347    | 0.174    | 0.459     | 6                                 | 7  | 8  | 9  | 7  |
| ATPD_MOUSE   | ATP5D       | ATP synthase subunit delta                                          | 0.217                                  | 0.152                                | -0.181                               | -0.019                                | 0.153               | 0.129             | 0.086             | 0.161              | 35.78      | 19.86    | 48.33    | >100.00   | 0.199      | 0.283    | 0.113    | 0.908     | 2                                 | 3  | 2  | 3  | 3  |
| ATP5E_MOUSE  | ATP5E       | ATP synthase subunit epsilon                                        | 0.094                                  | 0.132                                | -0.324                               | 0.096                                 | 0.134               | 0.163             | 0.150             | 0.185              | 59.24      | 23.67    | 48.33    | 51.06     | 0.506      | 0.461    | 0.098    | 0.629     | 2                                 | 3  | 3  | 3  | 1  |
| AT5F1_MOUSE  | ATP5F1      | ATP synthase subunit b                                              | 0.205                                  | 0.040                                | -0.149                               | 0.093                                 | 0.106               | 0.096             | 0.139             | 0.163              | 25.67      | 38.09    | 54.74    | 51.06     | 0.091      | 0.696    | 0.368    | 0.592     | 5                                 | 7  | 5  | 6  | 6  |
| ATPSH_MOUSE  | ATPSH       | ATP synthase subunit d                                              | 0.186                                  | 0.011                                | -0.173                               | 0.097                                 | 0.099               | 0.096             | 0.145             | 0.153              | 25.67      | >100.00  | 48.33    | 51.06     | 0.100      | 0.913    | 0.303    | 0.542     | 3                                 | 10 | 6  | 9  | 6  |
| ATPSL_MOUSE  | ATPSL       | ATP synthase subunit e                                              | 0.167                                  | 0.128                                | -0.224                               | 0.177                                 | 0.139               | 0.104             | 0.131             | 0.143              | 38.56      | 19.86    | 48.33    | 33.       |            |          |          |           |                                   |    |    |    |    |

|             |         |                                                                                                   |        |        |        |        |       |       |       |         |         |         |       |         |       |       |       |       |    |    |    |    |    |
|-------------|---------|---------------------------------------------------------------------------------------------------|--------|--------|--------|--------|-------|-------|-------|---------|---------|---------|-------|---------|-------|-------|-------|-------|----|----|----|----|----|
| CDC42_MOUSE | CDC42   | Cell division control protein 42 homolog                                                          | -0.060 | -0.046 | -0.035 | 0.144  | 0.095 | 0.043 | 0.127 | 0.085   | 66.90   | 45.18   | 75.29 | 33.94   | 0.548 | 0.321 | 0.794 | 0.131 | 3  | 4  | 4  | 4  | 3  |
| CADH2_MOUSE | CDH2    | Cadherin-2                                                                                        | 0.091  | -0.069 | 0.180  | -0.065 | 0.109 | 0.119 | 0.112 | 0.093   | 54.63   | 46.49   | 77.57 | 65.26   | 0.429 | 0.585 | 0.200 | 0.507 | 1  | 5  | 2  | 3  | 5  |
| CEND1_MOUSE | CEND1   | Cell cycle exit and neuronal differentiation protein 1                                            | 0.086  | 0.052  | -0.178 | 0.193  | 0.109 | 0.091 | 0.122 | 0.191   | 56.97   | 35.33   | 48.33 | 35.22   | 0.452 | 0.583 | 0.265 | 0.349 | 5  | 6  | 6  | 8  | 5  |
| COF1_MOUSE  | CFL1    | Cofilin-1                                                                                         | -0.028 | -0.165 | -0.332 | 0.181  | 0.088 | 0.077 | 0.203 | 0.167   | 69.52   | 9.19    | 48.33 | 33.94   | 0.763 | 0.064 | 0.131 | 0.308 | 6  | 12 | 5  | 7  | 6  |
| CISD1_MOUSE | CISD1   | CDGSH iron sulfur domain-containing protein 1                                                     | 0.202  | 0.016  | -0.068 | -0.247 | 0.125 | 0.074 | 0.106 | 0.145   | 30.45   | >100.00 | 69.92 | 10.00   | 0.145 | 0.833 | 0.546 | 0.130 | 3  | 5  | 5  | 4  | 2  |
| KCRB_MOUSE  | CKB     | Creatine kinase B-type                                                                            | -0.109 | -0.215 | -0.268 | 0.098  | 0.082 | 0.060 | 0.235 | 0.188   | 51.02   | 0.00    | 48.33 | 51.06   | 0.235 | 0.009 | 0.272 | 0.615 | 8  | 14 | 9  | 11 | 6  |
| KCRB_MOUSE  | CKMT1   | Creatine kinase, ubiquitous mitochondrial                                                         | 0.159  | 0.018  | -0.131 | 0.115  | 0.078 | 0.078 | 0.084 | 0.092   | 25.67   | >100.00 | 54.74 | 42.52   | 0.081 | 0.822 | 0.218 | 0.274 | 7  | 10 | 9  | 11 | 9  |
| CLCB_MOUSE  | CLTB    | Clathrin light chain B                                                                            | -0.110 | -0.160 | -0.236 | 0.139  | 0.132 | 0.068 | 0.162 | 0.186   | 62.80   | 9.19    | 48.33 | 45.40   | 0.445 | 0.047 | 0.178 | 0.478 | 4  | 4  | 3  | 2  | 3  |
| CLH_MOUSE   | CLTC    | Clathrin heavy chain 1                                                                            | -0.049 | -0.341 | -0.152 | -0.120 | 0.098 | 0.071 | 0.171 | 0.158   | 66.90   | 0.00    | 54.74 | 63.47   | 0.633 | 0.005 | 0.392 | 0.469 | 32 | 4  | 4  | 32 | 34 |
| CNTN3_MOUSE | CNP     | 2,3'-cyclic-nucleotide 3'-phosphodiesterase                                                       | -0.110 | 0.038  | 0.134  | 0.191  | 0.038 | 0.095 | 0.166 | 0.108   | 32.80   | 38.47   | 77.57 | 27.41   | 0.020 | 0.709 | 0.423 | 0.125 | 19 | 23 | 21 | 21 | 20 |
| CNTN1_MOUSE | CNTN1   | Contactin-1                                                                                       | -0.047 | 0.077  | 0.197  | -0.119 | 0.062 | 0.045 | 0.115 | 0.069   | 66.90   | 21.11   | 77.57 | 56.85   | 0.472 | 0.140 | 0.190 | 0.130 | 19 | 30 | 25 | 23 | 19 |
| CNTN1_MOUSE | CNTNAP1 | Contactin-associated protein 1                                                                    | 0.027  | 0.203  | 0.098  | 0.014  | 0.058 | 0.064 | 0.043 | 0.052   | 73.92   | 4.06    | 77.57 | 33.94   | 0.014 | 0.049 | 0.796 | 0.000 | 7  | 14 | 14 | 15 | 7  |
| COX41_MOUSE | COX41   | Cytochrome c oxidase subunit 4 isoform 1                                                          | 0.137  | 0.075  | -0.269 | -0.206 | 0.110 | 0.084 | 0.126 | 0.155   | 38.56   | 28.56   | 48.33 | 7.01    | 0.255 | 0.408 | 0.114 | 0.238 | 5  | 5  | 6  | 8  | 8  |
| COX5A_MOUSE | COX5A   | Cytochrome c oxidase subunit 5A                                                                   | 0.040  | 0.166  | 0.072  | -0.155 | 0.112 | 0.103 | 0.127 | 0.123   | 75.99   | 15.16   | 77.57 | 56.85   | 0.730 | 0.146 | 0.810 | 0.251 | 3  | 6  | 6  | 7  | 5  |
| COX5B_MOUSE | COX5B   | Cytochrome c oxidase subunit 5B                                                                   | 0.181  | 0.139  | -0.110 | 0.075  | 0.115 | 0.063 | 0.098 | 0.155   | 33.15   | 13.24   | 58.44 | 51.06   | 0.153 | 0.061 | 0.319 | 0.640 | 5  | 6  | 5  | 6  | 5  |
| COXB1_MOUSE | COXB1   | Cytochrome c oxidase subunit VIb isoform 1                                                        | 0.216  | -0.050 | -0.246 | -0.153 | 0.110 | 0.123 | 0.136 | 0.116   | 25.67   | >100.00 | 48.33 | 56.85   | 0.087 | 0.698 | 0.108 | 0.223 | 5  | 6  | 6  | 5  | 7  |
| COXC_MOUSE  | COXC    | Cytochrome c oxidase polypeptide VIc                                                              | 0.170  | 0.120  | -0.210 | -0.114 | 0.097 | 0.074 | 0.141 | 0.140   | 26.24   | 19.86   | 48.33 | 63.47   | 0.118 | 0.160 | 0.250 | 0.456 | 4  | 8  | 4  | 7  | 8  |
| CPNE4_MOUSE | CPNE4   | Copine-4                                                                                          | 0.022  | 0.071  | -0.048 | 0.036  | 0.108 | 0.085 | 0.172 | 0.088   | 76.98   | 30.09   | 73.06 | 54.22   | 0.850 | 0.437 | 0.783 | 0.694 | 1  | 3  | 2  | 3  | 4  |
| CPNE6_MOUSE | CPNE6   | Copine-6                                                                                          | -0.003 | 0.120  | 0.080  | 0.093  | 0.055 | 0.040 | 0.274 | 0.054   | >100.00 | 13.60   | 77.57 | 27.41   | 0.962 | 0.019 | 0.346 | 0.124 | 10 | 14 | 12 | 13 | 11 |
| DPYL1_MOUSE | CRMP1   | Dihydropyrimidinase-related protein 1                                                             | 0.127  | -0.239 | 0.018  | 0.105  | 0.151 | 0.089 | 0.247 | 0.220   | 53.37   | 2.29    | 84.42 | 51.06   | 0.426 | 0.036 | 0.947 | 0.646 | 5  | 4  | 1  | 4  | 2  |
| CISY_MOUSE  | CS      | Citrate synthase                                                                                  | 0.080  | 0.028  | -0.108 | 0.053  | 0.049 | 0.054 | 0.093 | 0.057   | 35.78   | 38.47   | 58.44 | 51.06   | 0.140 | 0.624 | 0.361 | 0.401 | 11 | 11 | 11 | 10 | 9  |
| CSR1_MOUSE  | CSR1    | Cysteine and glycine-rich protein 1                                                               | 0.159  | 0.073  | -0.148 | 0.237  | 0.117 | 0.103 | 0.185 | 0.163   | 38.56   | 31.23   | 54.74 | 27.41   | 0.215 | 0.498 | 0.432 | 0.191 | 1  | 4  | 2  | 4  | 3  |
| CTNA2_MOUSE | CTNNA2  | Catenin alpha-2                                                                                   | -0.044 | 0.050  | 0.071  | 0.007  | 0.043 | 0.052 | 0.063 | 0.043   | 62.80   | 31.23   | 77.57 | >100.00 | 0.335 | 0.359 | 0.271 | 0.870 | 8  | 17 | 14 | 16 | 11 |
| CTNB1_MOUSE | CTNNB1  | Catenin beta-1                                                                                    | -0.062 | -0.110 | 0.123  | -0.254 | 0.034 | 0.065 | 0.140 | 0.048   | 51.02   | 28.57   | 77.57 | 0.00    | 0.110 | 0.141 | 0.425 | 0.001 | 9  | 18 | 15 | 16 | 11 |
| CTND2_MOUSE | CTNND2  | Catenin delta-2                                                                                   | -0.073 | 0.045  | 0.071  | -0.168 | 0.112 | 0.089 | 0.053 | 0.094   | 66.90   | 36.56   | 77.57 | 30.51   | 0.541 | 0.630 | 0.198 | 0.120 | 1  | 6  | 9  | 6  | 4  |
| CY1_MOUSE   | CYC1    | Cytochrome c1, heme protein                                                                       | 0.395  | 0.209  | -0.177 | -0.110 | 0.118 | 0.176 | 0.210 | 0.158   | 13.12   | 19.86   | 48.33 | 65.26   | 0.012 | 0.272 | 0.458 | 0.514 | 1  | 8  | 4  | 4  | 4  |
| CYC_MOUSE   | CYCS    | Cytochrome c, somatic                                                                             | -0.045 | 0.183  | -0.107 | 0.068  | 0.089 | 0.060 | 0.149 | 0.065   | 66.90   | 5.52    | 66.03 | 65.26   | 0.627 | 0.016 | 0.469 | 0.328 | 5  | 7  | 6  | 6  | 5  |
| CYFP2_MOUSE | CYFP2   | Cytoplasmic FMR1-interacting protein 2                                                            | -0.097 | 0.097  | -0.047 | 0.070  | 0.077 | 0.075 | 0.073 | 0.073   | 53.37   | 21.11   | 70.13 | 65.26   | 0.244 | 0.242 | 0.554 | 0.365 | 3  | 7  | 4  | 6  | 4  |
| DREB_MOUSE  | DBN1    | Debrin                                                                                            | -0.094 | 0.029  | -0.095 | 0.157  | 0.080 | 0.090 | 0.140 | 0.120   | 53.37   | 40.45   | 70.88 | 33.94   | 0.285 | 0.757 | 0.514 | 0.227 | 2  | 6  | 4  | 1  | 3  |
| ODP2_MOUSE  | DLAT    | Dihydrolipoyllysine-residue acetyltransferase component of pyruvate dehydrogenase complex         | 0.042  | 0.013  | -0.048 | 0.104  | 0.076 | 0.073 | 0.152 | 0.080   | 71.43   | >100.00 | 73.06 | 42.52   | 0.599 | 0.865 | 0.780 | 0.234 | 4  | 7  | 4  | 4  | 4  |
| DLG2_MOUSE  | DLG2    | Disks large homolog 2                                                                             | -0.013 | 0.002  | 0.109  | -0.079 | 0.055 | 0.048 | 0.104 | 0.082   | 69.52   | >100.00 | 77.57 | 65.26   | 0.817 | 0.965 | 0.297 | 0.367 | 5  | 12 | 7  | 5  | 7  |
| DLG3_MOUSE  | DLG3    | Disks large homolog 3                                                                             | -0.065 | 0.140  | 0.208  | 0.044  | 0.031 | 0.050 | 0.144 | 0.057   | 50.18   | 9.08    | 77.57 | 51.06   | 0.090 | 0.026 | 0.234 | 0.467 | 2  | 6  | 5  | 7  | 6  |
| DLG4_MOUSE  | DLG4    | Disks large homolog 4                                                                             | 0.013  | 0.076  | 0.079  | -0.067 | 0.057 | 0.054 | 0.079 | 0.061   | 76.98   | 21.11   | 77.57 | 65.26   | 0.820 | 0.201 | 0.394 | 0.317 | 13 | 19 | 14 | 17 | 17 |
| DLGP3_MOUSE | DLGAP3  | Disks large-associated protein 3                                                                  | 0.047  | 0.102  | -0.077 | -0.208 | 0.071 | 0.065 | 0.174 | 0.145   | 66.90   | 19.86   | 69.92 | 30.51   | 0.521 | 0.176 | 0.656 | 0.221 | 1  | 4  | 6  | 5  | 3  |
| ODO2_MOUSE  | DLST    | Dihydrolipoyllysine-residue succinyltransferase component of 2-oxoglutarate dehydrogenase complex | 0.177  | -0.065 | -0.162 | 0.067  | 0.052 | 0.085 | 0.139 | 0.081   | 11.25   | 45.18   | 48.33 | 51.06   | 0.018 | 0.475 | 0.322 | 0.433 | 5  | 6  | 5  | 4  | 5  |
| DNJC5_MOUSE | DNAJC5  | Dnaj homolog subfamily C member 5                                                                 | -0.066 | -0.276 | 0.090  | -0.748 | 0.071 | 0.080 | 0.090 | 0.089   | 62.80   | 0.00    | 77.57 | 0.00    | 0.384 | 0.010 | 0.350 | 0.000 | 4  | 6  | 4  | 5  | 3  |
| DYN1_MOUSE  | DNM1    | Dynamin-1                                                                                         | -0.124 | -0.048 | -0.028 | 0.074  | 0.056 | 0.059 | 0.073 | 0.082   | 36.04   | 46.49   | 75.06 | 51.06   | 0.062 | 0.443 | 0.736 | 0.392 | 18 | 26 | 20 | 24 | 17 |
| DPP10_MOUSE | DPP10   | Inactive dipeptidyl peptidase 10                                                                  | -0.023 | 0.036  | -0.148 | -0.068 | 0.089 | 0.108 | 0.110 | 0.083   | 69.52   | 40.16   | 48.33 | 30.51   | 0.803 | 0.747 | 0.258 | 0.431 | 3  | 3  | 5  | 4  | 5  |
| DPP6_MOUSE  | DPP6    | Dipeptidyl aminopeptidase-like protein 6                                                          | -0.070 | 0.043  | 0.149  | 0.048  | 0.079 | 0.069 | 0.098 | 0.098   | 51.02   | 36.56   | 77.57 | 56.85   | 0.184 | 0.606 | 0.060 | 0.230 | 3  | 9  | 6  | 4  | 5  |
| DPYL2_MOUSE | DPYSL2  | Dihydropyrimidinase-related protein 2                                                             | -0.084 | -0.148 | -0.304 | 0.230  | 0.068 | 0.069 | 0.296 | 0.200   | 53.37   | 9.59    | 48.33 | 33.94   | 0.260 | 0.082 | 0.329 | 0.282 | 11 | 9  | 9  | 10 | 9  |
| DYHC1_MOUSE | DYNC1H1 | Cytoplasmic dynein 1 heavy chain 1                                                                | 0.024  | -0.068 | -0.043 | 0.198  | 0.053 | 0.082 | 0.077 | 0.026   | 73.92   | 45.18   | 72.70 | 11.39   | 0.662 | 0.432 | 0.569 | 0.000 | 3  | 8  | 7  | 11 | 12 |
| EF1A1_MOUSE | EEF1A1  | Elongation factor 1-alpha 1                                                                       | 0.026  | 0.017  | 0.151  | 0.089  | 0.060 | 0.040 | 0.073 | 0.099   | 73.92   | >100.00 | 77.57 | 51.06   | 0.672 | 0.679 | 0.072 | 0.399 | 3  | 6  | 6  | 5  | 5  |
| EF1A2_MOUSE | EEF1A2  | Elongation factor 1-alpha 2                                                                       | -0.059 | 0.023  | 0.074  | -0.023 | 0.042 | 0.051 | 0.074 | 0.053   | 53.37   | 40.16   | 77.57 | >100.00 | 0.210 | 0.663 | 0.414 | 0.683 | 4  | 4  | 4  | 4  | 4  |
| ENOA_MOUSE  | ENO1    | Alpha-enolase                                                                                     | -0.099 | -0.209 | -0.276 | 0.205  | 0.091 | 0.070 | 0.302 | 0.175   | 55.36   | 2.29    | 48.33 | 33.94   | 0.314 | 0.018 | 0.400 | 0.279 | 10 | 12 | 10 | 11 | 12 |
| ENOG_MOUSE  | ENO2    | Gamma-enolase                                                                                     | -0.071 | -0.089 | -0.186 | 0.151  | 0.078 | 0.048 | 0.228 | 0.158   | 62.80   | 34.22   | 48.33 | 42.52   | 0.390 | 0.129 | 0.443 | 0.370 | 7  | 6  | 8  | 9  | 9  |
| E41L1_MOUSE | EPB41L1 | Band 4.1-like protein 1                                                                           | 0.011  | 0.147  | -0.084 | 0.013  | 0.094 | 0.098 | 0.086 | 0.131   | 76.98   | 19.86   | 70.88 | >100.00 | 0.910 | 0.174 | 0.373 | 0.926 | 1  | 12 | 4  | 4  | 3  |
| E41L2_MOUSE | EPB41L2 | Band 4.1-like protein 2                                                                           | -0.020 | 0.123  | 0.178  | 0.250  | 0.081 | 0.045 | 0.110 | 0.097   | 69.52   | 13.24   | 77.57 | 21.42   | 0.809 | 0.026 | 0.189 | 0.033 | 2  | 9  | 10 | 7  | 3  |
| EPHA4_MOUSE | EPHA4   | Ephrin type-A receptor 4                                                                          | 0.056  | 0.020  | -0.137 | 0.069  | 0.048 | 0.068 | 0.054 | 0.056   | 50.52   | >100.00 | 48.33 | 51.06   | 0.280 | 0.781 | 0.049 | 0.261 | 4  | 4  | 6  | 7  | 3  |
| ERC2_MOUSE  | ERC2    | ERC protein 2                                                                                     | -0.039 | 0.046  | 0.075  | -0.059 | 0.048 | 0.051 | 0.098 | 0.076   | 66.90   | 33.34   | 77.57 | 65.26   | 0.464 | 0.402 | 0.443 | 0.465 | 5  | 14 | 10 | 11 | 7  |
| FUMH_MOUSE  | FH      | Fumarate hydratase                                                                                | -0.097 | 0.004  | 0.031  | 0.115  | 0.074 | 0.060 | 0.068 | 0.084   | 51.02   | >100.00 | 84.42 | 42.52   | 0.226 | 0.956 | 0.683 | 0.212 | 5  | 7  | 2  | 4  | 4  |
| FLOT1_MOUSE | FLOT1   | Flotillin-1                                                                                       | 0.024  | 0.040  | 0.155  | 0.194  | 0.080 | 0.090 | 0.116 | 0.089   | 76.88   | 38.09   | 77.57 | 27.41   | 0.770 | 0.674 | 0.288 | 0.067 | 2  | 6  | 4  | 5  | 3  |
| FLOT2_MOUSE | FLOT2   | Flotillin-2                                                                                       | 0.039  | 0.257  | 0.141  | -0.008 | 0.048 | 0.062 | 0.071 | 0.066   | 59.73   | 3.50    | 77.57 | >100.00 | 0.441 | 0.003 | 0.089 | 0.902 | 3  | 5  | 5  | 5  | 2  |
| GBRB3_MOUSE | GABRB3  | Gamma-aminobutyric acid receptor subunit beta-3                                                   | 0.113  | 0.076  | 0.027  | -0.091 | 0.046 | 0.064 | 0.100 | 0.084   | 25.67   | 22.83   | 84.42 | 63.03   | 0.039 | 0.282 | 0.786 | 0.316 | 2  | 5  | 4  | 3  | 2  |
| NEUM_MOUSE  | GAP43   | Neuromodulin                                                                                      | -0.049 | 0.025  | 0.069  | -0.294 | 0.077 | 0.053 | 0.134 | 0.098   | 66.90   | >100.00 | 77.57 | 3.09    | 0.549 | 0.775 | 0.656 | 0.034 | 9  | 11 | 12 | 13 | 8  |
| G3P_MOUSE   | GAPDH   | Glyceraldehyde-3-phosphate dehydrogenase                                                          | -0.118 | 0.166  | 0.242  | 0.254  | 0.084 | 0.088 | 0.132 | 0.173</ |         |         |       |         |       |       |       |       |    |    |    |    |    |

|              |          |                                                        |        |        |        |        |       |       |       |       |         |         |         |         |       |       |       |       |    |    |    |    |    |
|--------------|----------|--------------------------------------------------------|--------|--------|--------|--------|-------|-------|-------|-------|---------|---------|---------|---------|-------|-------|-------|-------|----|----|----|----|----|
| GRM3_MOUSE   | GRM3     | Metabotropic glutamate receptor 3                      | -0.109 | 0.075  | 0.157  | 0.165  | 0.082 | 0.100 | 0.144 | 0.152 | 51.02   | 30.67   | 77.57   | 36.77   | 0.219 | 0.477 | 0.321 | 0.312 | 1  | 5  | 4  | 6  | 4  |
| GRM5_MOUSE   | GRM5     | Metabotropic glutamate receptor 5                      | -0.093 | 0.075  | 0.111  | -0.146 | 0.062 | 0.069 | 0.068 | 0.066 | 51.02   | 24.72   | 77.57   | 30.51   | 0.175 | 0.311 | 0.171 | 0.087 | 4  | 7  | 8  | 8  | 7  |
| GSTM5_MOUSE  | GSTM5    | Glutathione S-transferase Mu 5                         | -0.052 | -0.096 | -0.335 | -0.003 | 0.118 | 0.103 | 0.218 | 0.151 | 67.56   | 42.52   | 48.33   | >100.00 | 0.675 | 0.390 | 0.183 | 0.986 | 3  | 3  | 6  | 2  | 3  |
| ECHA_MOUSE   | HADHA    | Trifunctional enzyme subunit alpha                     | 0.091  | -0.019 | -0.018 | 0.023  | 0.056 | 0.080 | 0.146 | 0.085 | 35.78   | 22.38   | 82.63   | >100.00 | 0.145 | 0.822 | 0.910 | 0.792 | 3  | 7  | 6  | 3  | 5  |
| ECHB_MOUSE   | HADHB    | Trifunctional enzyme subunit beta                      | 0.208  | 0.170  | 0.026  | -0.006 | 0.060 | 0.095 | 0.081 | 0.135 | 13.12   | 13.24   | 84.42   | >100.00 | 0.015 | 0.133 | 0.760 | 0.966 | 3  | 4  | 5  | 3  | 3  |
| HPLN1_MOUSE  | HAPLN1   | Hyaluronan and proteoglycan link protein 1             | -0.005 | 0.201  | 0.163  | 0.072  | 0.099 | 0.071 | 0.172 | 0.118 | 75.25   | 5.52    | 77.57   | 51.06   | 0.962 | 0.023 | 0.352 | 0.560 | 6  | 10 | 10 | 11 | 8  |
| HBA_MOUSE    | HBA      | Hemoglobin subunit alpha                               | 0.174  | 0.179  | -0.067 | 0.115  | 0.043 | 0.057 | 0.073 | 0.102 | 13.12   | 5.52    | 71.59   | 42.52   | 0.004 | 0.018 | 0.417 | 0.302 | 2  | 3  | 4  | 3  | 3  |
| HKK1_MOUSE   | HK1      | Hexokinase-1                                           | 0.139  | 0.004  | -0.147 | 0.123  | 0.067 | 0.029 | 0.113 | 0.051 | 25.67   | >100.00 | 48.33   | 33.94   | 0.075 | 0.906 | 0.300 | 0.043 | 25 | 36 | 31 | 31 | 26 |
| NTRI_MOUSE   | HNT      | Neurotrophin                                           | -0.075 | 0.196  | 0.137  | -0.018 | 0.040 | 0.059 | 0.122 | 0.059 | 51.02   | 4.06    | 77.57   | >100.00 | 0.101 | 0.015 | 0.311 | 0.770 | 5  | 9  | 8  | 6  | 6  |
| HOM1_MOUSE   | HOMER1   | Hommer protein homolog 1                               | -0.042 | -0.016 | 0.094  | -0.092 | 0.072 | 0.076 | 0.087 | 0.100 | 66.90   | >100.00 | 77.57   | 64.08   | 0.586 | 0.837 | 0.305 | 0.385 | 4  | 9  | 11 | 5  | 5  |
| RASH_MOUSE   | HRAS     | GTPase HRas                                            | -0.090 | -0.086 | 0.098  | 0.023  | 0.100 | 0.064 | 0.087 | 0.071 | 62.80   | 40.16   | 77.57   | 57.99   | 0.394 | 0.229 | 0.424 | 0.759 | 4  | 3  | 4  | 3  | 4  |
| HSP90A_MOUSE | HSP90A   | Heat shock protein HSP 90-alpha                        | -0.083 | -0.146 | -0.094 | 0.092  | 0.094 | 0.073 | 0.165 | 0.103 | 61.86   | 12.05   | 71.00   | 51.06   | 0.353 | 0.095 | 0.615 | 0.478 | 8  | 10 | 7  | 12 | 6  |
| HSP9B_MOUSE  | HSP90AB1 | Heat shock protein HSP 90-beta                         | 0.007  | -0.083 | 0.058  | 0.025  | 0.066 | 0.099 | 0.146 | 0.143 | 76.98   | 43.44   | 81.64   | >100.00 | 0.913 | 0.427 | 0.702 | 0.865 | 3  | 4  | 5  | 4  | 5  |
| ENPL_MOUSE   | HSP90B1  | Endoplasmic                                            | -0.021 | 0.071  | 0.115  | 0.181  | 0.067 | 0.089 | 0.080 | 0.097 | 69.52   | 30.53   | 77.57   | 27.41   | 0.765 | 0.458 | 0.201 | 0.108 | 2  | 4  | 5  | 4  | 3  |
| GRF78_MOUSE  | HSPA5    | 78 kDa glucose-regulated protein                       | 0.026  | 0.087  | 0.002  | 0.037  | 0.069 | 0.073 | 0.071 | 0.046 | 76.35   | 21.11   | >100.00 | 52.60   | 0.723 | 0.277 | 0.979 | 0.458 | 2  | 10 | 9  | 7  | 7  |
| HSP7C_MOUSE  | HSPA8    | Heat shock cognate 71 kDa protein                      | -0.052 | -0.069 | -0.049 | 0.114  | 0.033 | 0.036 | 0.082 | 0.076 | 51.02   | 40.16   | 70.13   | 37.40   | 0.159 | 0.126 | 0.541 | 0.193 | 17 | 22 | 18 | 23 | 19 |
| GRF75_MOUSE  | HSPA9    | Stress-70 protein                                      | 0.039  | 0.050  | -0.028 | 0.000  | 0.072 | 0.075 | 0.072 | 0.123 | 71.60   | 35.33   | 75.06   | >100.00 | 0.605 | 0.528 | 0.721 | 1.000 | 3  | 3  | 4  | 3  | 5  |
| CH10_MOUSE   | HSPF1    | 10 kDa heat shock protein                              | 0.122  | -0.279 | -0.397 | 0.204  | 0.110 | 0.122 | 0.239 | 0.150 | 47.77   | 4.26    | 48.33   | 33.94   | 0.303 | 0.053 | 0.142 | 0.212 | 4  | 4  | 3  | 2  | 3  |
| ICAM5_MOUSE  | ICAM5    | Intercellular adhesion molecule 5                      | -0.016 | -0.173 | 0.105  | -0.118 | 0.074 | 0.039 | 0.101 | 0.086 | 69.52   | 4.06    | 77.57   | 56.85   | 0.832 | 0.003 | 0.322 | 0.211 | 7  | 11 | 11 | 11 | 13 |
| IDH3A_MOUSE  | IDH3A    | Isocitrate dehydrogenase [NAD] subunit alpha           | 0.165  | -0.265 | -0.291 | -0.053 | 0.074 | 0.083 | 0.241 | 0.171 | 25.67   | 0.00    | 48.33   | >100.00 | 0.078 | 0.014 | 0.297 | 0.767 | 8  | 7  | 7  | 8  | 6  |
| IDH3G_MOUSE  | IDH3G    | Isocitrate dehydrogenase [NAD] subunit gamma           | 0.114  | 0.025  | 0.125  | -0.176 | 0.086 | 0.081 | 0.102 | 0.171 | 38.56   | >100.00 | 77.57   | 56.85   | 0.241 | 0.768 | 0.239 | 0.343 | 3  | 4  | 3  | 3  | 1  |
| IGSF8_MOUSE  | IGSF8    | Immunoglobulin superfamily member 8                    | -0.016 | 0.099  | 0.154  | 0.099  | 0.062 | 0.069 | 0.083 | 0.174 | 69.52   | 19.86   | 77.57   | 42.52   | 0.868 | 0.186 | 0.091 | 0.247 | 5  | 7  | 6  | 6  | 6  |
| IMMT_MOUSE   | IMMT     | Mitochondrial inner membrane protein                   | 0.157  | 0.092  | -0.073 | -0.077 | 0.060 | 0.074 | 0.067 | 0.106 | 25.67   | 21.11   | 71.00   | 65.26   | 0.035 | 0.254 | 0.381 | 0.488 | 10 | 18 | 14 | 15 | 20 |
| AIXX_MOUSE   | INA      | Alpha-internexin                                       | -0.060 | -0.007 | 0.129  | 0.044  | 0.097 | 0.069 | 0.118 | 0.065 | 66.90   | >100.00 | 77.57   | 51.06   | 0.554 | 0.929 | 0.291 | 0.516 | 5  | 11 | 10 | 13 | 8  |
| IQEC2_MOUSE  | IQSEC2   | IQ motif and SEC7 domain-containing protein 2          | 0.068  | -0.142 | 0.080  | 0.008  | 0.098 | 0.083 | 0.085 | 0.179 | 60.32   | 19.86   | 77.57   | >100.00 | 0.512 | 0.128 | 0.352 | 0.964 | 1  | 4  | 4  | 4  | 2  |
| KCAB2_MOUSE  | KCNAB2   | Voltage-gated potassium channel subunit beta-2         | -0.021 | 0.239  | 0.135  | 0.157  | 0.058 | 0.063 | 0.101 | 0.069 | 69.52   | 3.50    | 77.57   | 27.41   | 0.729 | 0.007 | 0.267 | 0.055 | 2  | 6  | 5  | 3  | 5  |
| L1CAM_MOUSE  | L1CAM    | Neural cell adhesion molecule L1                       | -0.182 | -0.095 | 0.136  | 0.022  | 0.048 | 0.036 | 0.123 | 0.076 | 14.31   | 22.83   | 77.57   | >100.00 | 0.006 | 0.035 | 0.370 | 0.787 | 7  | 12 | 13 | 11 | 11 |
| LDHA_MOUSE   | LDHA     | L-lactate dehydrogenase A chain                        | -0.130 | -0.223 | -0.071 | -0.019 | 0.127 | 0.118 | 0.299 | 0.164 | 55.36   | 9.19    | 70.13   | >100.00 | 0.343 | 0.100 | 0.821 | 0.910 | 3  | 3  | 2  | 4  | 2  |
| LDHB_MOUSE   | LDHB     | L-lactate dehydrogenase B chain                        | -0.116 | -0.245 | -0.302 | -0.062 | 0.042 | 0.076 | 0.203 | 0.133 | 32.80   | 0.00    | 48.33   | >100.00 | 0.024 | 0.015 | 0.161 | 0.664 | 6  | 7  | 4  | 5  | 4  |
| LGH1_MOUSE   | LGH1     | Leucine-rich glioma-inactivated protein 1              | -0.023 | 0.028  | 0.009  | -0.124 | 0.025 | 0.068 | 0.089 | 0.081 | 66.90   | 40.16   | 84.30   | 56.85   | 0.395 | 0.694 | 0.916 | 0.169 | 6  | 7  | 4  | 6  | 5  |
| LIGO1_MOUSE  | LIGO1    | receptor-interacting protein 1                         | -0.091 | 0.071  | 0.046  | -0.151 | 0.065 | 0.072 | 0.059 | 0.073 | 38.56   | 26.99   | 81.76   | 34.59   | 0.206 | 0.348 | 0.646 | 0.094 | 6  | 8  | 7  | 6  | 4  |
| IPPR4_MOUSE  | LIPR4    | Lipid phosphate phosphatase-related protein type 4     | -0.073 | 0.045  | 0.045  | 0.147  | 0.086 | 0.077 | 0.116 | 0.063 | 66.90   | >100.00 | 81.76   | 33.94   | 0.423 | 0.843 | 0.732 | 0.154 | 4  | 6  | 4  | 4  | 5  |
| LRP1_MOUSE   | LRP1     | Protein-density lipoprotein receptor-related protein 1 | 0.017  | 0.147  | -0.002 | 0.197  | 0.061 | 0.123 | 0.131 | 0.073 | 76.88   | 19.86   | >100.00 | 21.15   | 0.786 | 0.285 | 0.986 | 0.015 | 1  | 6  | 12 | 5  | 3  |
| LSAMP_MOUSE  | LSAMP    | Limbic system-associated membrane protein              | -0.018 | 0.113  | 0.242  | 0.130  | 0.062 | 0.072 | 0.103 | 0.086 | 69.52   | 19.86   | 77.57   | 33.94   | 0.781 | 0.160 | 0.064 | 0.182 | 5  | 10 | 9  | 10 | 8  |
| AFOA_MOUSE   | MAOA     | Amine oxidase [flavin-containing] A                    | 0.022  | 0.042  | 0.273  | 0.056  | 0.084 | 0.088 | 0.104 | 0.078 | 76.88   | 37.23   | 77.57   | 51.06   | 0.798 | 0.651 | 0.073 | 0.492 | 1  | 2  | 4  | 3  | 3  |
| MAP1A_MOUSE  | MAP1A    | Microtubule-associated protein 1A                      | 0.002  | 0.056  | 0.029  | -0.014 | 0.023 | 0.059 | 0.051 | 0.039 | >100.00 | 30.67   | 84.42   | >100.00 | 0.950 | 0.370 | 0.583 | 0.732 | 7  | 24 | 22 | 22 | 17 |
| MAP1B_MOUSE  | MAP1B    | Microtubule-associated protein 1B                      | -0.151 | 0.028  | -0.054 | 0.078  | 0.040 | 0.049 | 0.062 | 0.041 | 14.31   | 38.09   | 70.39   | 42.52   | 0.012 | 0.587 | 0.374 | 0.110 | 5  | 13 | 15 | 20 | 11 |
| MAP2_MOUSE   | MAP2     | Microtubule-associated protein 2                       | -0.048 | 0.097  | -0.077 | -0.009 | 0.097 | 0.089 | 0.068 | 0.074 | 66.90   | 21.11   | 70.88   | >100.00 | 0.634 | 0.314 | 0.335 | 0.909 | 3  | 4  | 2  | 4  | 2  |
| MAP6_MOUSE   | MAP6     | Microtubule-associated protein 6                       | 0.008  | 0.029  | 0.043  | 0.051  | 0.039 | 0.040 | 0.029 | 0.047 | 76.98   | 37.23   | 81.64   | 51.06   | 0.848 | 0.481 | 0.168 | 0.309 | 10 | 24 | 11 | 21 | 16 |
| MK01_MOUSE   | MAPK1    | Mitogen-activated protein kinase 1                     | 0.166  | 0.143  | -0.077 | 0.219  | 0.115 | 0.066 | 0.109 | 0.049 | 35.78   | 13.24   | 71.00   | 16.41   | 0.191 | 0.063 | 0.504 | 0.002 | 4  | 5  | 3  | 5  | 4  |
| MDH1_MOUSE   | MDH1     | Malate dehydrogenase, cytoplasmic                      | -0.077 | -0.246 | -0.190 | 0.203  | 0.105 | 0.076 | 0.255 | 0.167 | 66.90   | 0.00    | 48.33   | 33.94   | 0.490 | 0.012 | 0.475 | 0.262 | 7  | 6  | 5  | 5  | 3  |
| MDH2_MOUSE   | MDH2     | Malate dehydrogenase                                   | 0.020  | -0.016 | -0.021 | 0.041  | 0.034 | 0.055 | 0.080 | 0.031 | 74.06   | >100.00 | 80.37   | 51.06   | 0.578 | 0.785 | 0.808 | 0.226 | 16 | 18 | 13 | 15 | 14 |
| MINK1_MOUSE  | MINK1    | Missenden-like kinase 1                                | -0.202 | 0.194  | -0.145 | 0.009  | 0.063 | 0.133 | 0.181 | 0.190 | 13.12   | 15.16   | 54.74   | >100.00 | 0.016 | 0.183 | 0.426 | 0.965 | 1  | 3  | 5  | 4  | 1  |
| MPP2_MOUSE   | MPP2     | MAGUK p55 subfamily member 2                           | -0.098 | 0.170  | -0.136 | -0.012 | 0.162 | 0.112 | 0.220 | 0.131 | 66.90   | 15.03   | 61.72   | >100.00 | 0.567 | 0.195 | 0.566 | 0.928 | 1  | 7  | 5  | 7  | 3  |
| MTCH2_MOUSE  | MTCH2    | Mitochondrial carrier homolog 2                        | 0.076  | 0.149  | 0.068  | 0.056  | 0.067 | 0.110 | 0.149 | 0.091 | 50.18   | 19.86   | 77.57   | 51.06   | 0.291 | 0.219 | 0.682 | 0.560 | 2  | 4  | 2  | 4  | 2  |
| MYH10_MOUSE  | MYH10    | Myosin-10                                              | -0.023 | 0.038  | -0.120 | -0.078 | 0.106 | 0.084 | 0.130 | 0.114 | 69.52   | 38.09   | 58.44   | 65.26   | 0.835 | 0.664 | 0.378 | 0.517 | 2  | 3  | 3  | 3  | 1  |
| MRLC2_MOUSE  | MYL12B   | Myosin regulatory light chain MRLC2                    | -0.014 | -0.010 | 0.055  | -0.005 | 0.065 | 0.103 | 0.100 | 0.080 | 69.52   | >100.00 | 81.64   | >100.00 | 0.834 | 0.922 | 0.608 | 0.952 | 2  | 3  | 3  | 3  | 3  |
| MYO5A_MOUSE  | MYO5A    | Myosin-Va                                              | -0.055 | -0.059 | -0.029 | 0.070  | 0.109 | 0.076 | 0.093 | 0.087 | 66.90   | 45.18   | 75.06   | 51.06   | 0.627 | 0.462 | 0.768 | 0.455 | 1  | 7  | 7  | 10 | 7  |
| SNAP_MOUSE   | NAPB     | Beta-soluble NSF attachment protein                    | -0.211 | -0.208 | -0.215 | -0.090 | 0.138 | 0.111 | 0.178 | 0.138 | 48.32   | 9.19    | 48.33   | 65.26   | 0.166 | 0.129 | 0.274 | 0.536 | 2  | 5  | 5  | 7  | 6  |
| SNAPC_MOUSE  | NAPC     | Gamma-soluble NSF attachment protein                   | -0.003 | -0.204 | -0.142 | -0.045 | 0.113 | 0.085 | 0.172 | 0.196 | >100.00 | 4.67    | 54.74   | >100.00 | 0.979 | 0.062 | 0.406 | 0.826 | 2  | 5  | 4  | 5  | 4  |
| NCA1_MOUSE   | NCA1     | Neural cell adhesion molecule 1                        | -0.175 | 0.224  | 0.011  | 0.037  | 0.081 | 0.099 | 0.056 | 0.082 | 36.94   | 6.94    | 84.42   | >100.00 | 0.079 | 0.054 | 0.948 | 0.931 | 3  | 6  | 7  | 5  | 4  |
| NCA2_MOUSE   | NCA2     | Neural cell adhesion molecule 2                        | 0.115  | 0.120  | 0.066  | 0.115  | 0.075 | 0.056 | 0.101 | 0.066 | 35.78   | 15.16   | 77.57   | 33.94   | 0.165 | 0.073 | 0.539 | 0.074 | 3  | 6  | 6  | 7  | 9  |
| NCAN_MOUSE   | NCAN     | Neurocan core protein                                  | 0.033  | 0.263  | 0.274  | 0.067  | 0.106 | 0.075 | 0.198 | 0.119 | 76.88   | 3.50    | 77.57   | 51.06   | 0.769 | 0.009 | 0.192 | 0.593 | 6  | 6  | 7  | 7  | 6  |
| NCDN_MOUSE   | NCDN     | Neurochondrin                                          | 0.018  | -0.146 | -0.130 | 0.153  | 0.107 | 0.100 | 0.237 | 0.103 | 76.88   | 26.36   | 61.72   | 33.94   | 0.874 | 0.191 | 0.618 | 0.177 | 1  | 2  | 3  | 4  | 4  |
| NCKP1_MOUSE  | NCKP1    | Nck-associated protein 1                               | 0.071  | -0.023 | -0.012 |        |       |       |       |       |         |         |         |         |       |       |       |       |    |    |    |    |    |

|              |         |                                                                         |        |        |        |        |       |       |       |       |         |         |         |         |       |       |       |       |   |    |    |    |    |
|--------------|---------|-------------------------------------------------------------------------|--------|--------|--------|--------|-------|-------|-------|-------|---------|---------|---------|---------|-------|-------|-------|-------|---|----|----|----|----|
| PACN1_MOUSE  | PACSIN1 | Protein kinase C and casein kinase substrate in neurons protein 1       | -0.099 | -0.187 | -0.149 | 0.337  | 0.097 | 0.085 | 0.245 | 0.202 | 58.53   | 8.39    | 55.07   | 21.15   | 0.339 | 0.072 | 0.561 | 0.149 | 6 | 8  | 6  | 7  | 4  |
| PALM_MOUSE   | PALM    | Paralemin                                                               | 0.023  | 0.027  | 0.174  | 0.074  | 0.092 | 0.053 | 0.074 | 0.094 | 76.88   | 38.86   | 77.57   | 51.06   | 0.812 | 0.626 | 0.100 | 0.453 | 6 | 11 | 10 | 10 | 9  |
| 148678151    | PCDH1   | protodcaherin 1                                                         | 0.074  | 0.023  | 0.167  | -0.023 | 0.076 | 0.058 | 0.073 | 0.092 | 52.48   | >100.00 | 77.57   | >100.00 | 0.476 | 0.049 | 0.808 | 0.4   | 8 | 8  | 4  | 9  |    |
| PCLO_MOUSE   | PCLO    | Protein piccolo                                                         | 0.099  | 0.000  | 0.163  | -0.015 | 0.085 | 0.033 | 0.121 | 0.047 | 47.77   | >100.00 | 77.57   | >100.00 | 0.276 | 0.991 | 0.252 | 0.760 | 5 | 26 | 21 | 25 | 18 |
| PCSK1_MOUSE  | PCSK1N  | ProSAAS                                                                 | -0.232 | 0.121  | -0.073 | -0.029 | 0.190 | 0.019 | 0.100 | 0.153 | 51.02   | 21.11   | 71.00   | >100.00 | 0.282 | 0.470 | 0.853 | 1     | 2 | 3  | 4  | 3  |    |
| ODPA_MOUSE   | PDHA1   | Pyruvate dehydrogenase E1 component subunit alpha, somatic form         | 0.229  | -0.054 | -0.145 | -0.115 | 0.055 | 0.078 | 0.105 | 0.081 | 13.12   | 46.49   | 48.33   | 56.85   | 0.010 | 0.512 | 0.257 | 0.194 | 6 | 10 | 10 | 8  | 9  |
| ODPB_MOUSE   | PDHB    | Pyruvate dehydrogenase E1 component subunit beta                        | 0.093  | -0.037 | -0.146 | 0.074  | 0.072 | 0.073 | 0.109 | 0.073 | 39.76   | >100.00 | 48.33   | 51.06   | 0.240 | 0.623 | 0.263 | 0.351 | 6 | 9  | 7  | 9  | 8  |
| PDAI3_MOUSE  | PDAI3   | Protein disulfide-isomerase A3                                          | 0.099  | 0.090  | -0.006 | 0.086  | 0.036 | 0.054 | 0.098 | 0.039 | 25.67   | 19.86   | >100.00 | 42.52   | 0.024 | 0.135 | 0.957 | 0.067 | 6 | 8  | 9  | 8  | 6  |
| K6PF_MOUSE   | PFKM    | 6-phosphofructokinase, muscle type                                      | 0.018  | 0.000  | -0.010 | -0.068 | 0.035 | 0.064 | 0.049 | 0.101 | 73.92   | >100.00 | 85.80   | 65.26   | 0.626 | 1.000 | 0.861 | 0.523 | 5 | 4  | 6  | 3  | 4  |
| PROF2_MOUSE  | PFN2    | Profilin-2                                                              | 0.022  | -0.121 | -0.384 | 0.090  | 0.081 | 0.169 | 0.389 | 0.176 | 76.88   | 43.44   | 48.33   | 51.06   | 0.795 | 0.500 | 0.329 | 0.625 | 2 | 3  | 3  | 3  | 1  |
| PGAM1_MOUSE  | PGAM1   | Phosphoglycerate mutase 1                                               | 0.001  | -0.062 | -0.176 | 0.059  | 0.075 | 0.077 | 0.263 | 0.167 | >100.00 | 45.18   | 54.74   | 52.60   | 0.993 | 0.466 | 0.543 | 0.734 | 4 | 10 | 6  | 10 | 5  |
| PGRC1_MOUSE  | PGRCM1  | Membrane-associated progesterone receptor component 1                   | -0.172 | 0.043  | -0.156 | -0.074 | 0.120 | 0.098 | 0.067 | 0.122 | 51.02   | 38.09   | 48.33   | 65.26   | 0.195 | 0.690 | 0.046 | 0.565 | 2 | 4  | 5  | 4  | 2  |
| PHB_MOUSE    | PHB     | Prohibitin                                                              | 0.181  | 0.196  | -0.033 | 0.049  | 0.071 | 0.043 | 0.067 | 0.073 | 25.67   | 8.39    | 75.29   | 51.06   | 0.038 | 0.014 | 0.723 | 0.521 | 4 | 8  | 7  | 7  | 5  |
| PHB2_MOUSE   | PHB2    | Prohibitin-2                                                            | 0.190  | 0.065  | -0.002 | 0.048  | 0.082 | 0.051 | 0.126 | 0.073 | 25.67   | 21.11   | >100.00 | 51.06   | 0.059 | 0.137 | 0.989 | 0.532 | 3 | 9  | 7  | 7  | 6  |
| KPYM_MOUSE   | PKM2    | Pyruvate kinase isozymes M1/M2                                          | -0.016 | -0.188 | 0.194  | -0.237 | 0.103 | 0.051 | 0.197 | 0.077 | 69.52   | 2.48    | 77.57   | 7.46    | 0.881 | 0.012 | 0.426 | 0.016 | 5 | 5  | 5  | 5  | 5  |
| PKP4_MOUSE   | PKP4    | Plakophilin-4                                                           | 0.013  | 0.062  | 0.197  | 0.108  | 0.074 | 0.106 | 0.132 | 0.099 | 76.98   | 35.33   | 77.57   | 42.52   | 0.867 | 0.586 | 0.159 | 0.311 | 1 | 5  | 4  | 3  | 3  |
| FLEC1_MOUSE  | FLEC1   | Plectin-1                                                               | 0.014  | 0.098  | 0.004  | 0.069  | 0.086 | 0.064 | 0.055 | 0.073 | 72.98   | 19.86   | 85.31   | 51.06   | 0.876 | 0.164 | 0.944 | 0.372 | 3 | 13 | 12 | 14 | 6  |
| MYPR_MOUSE   | PLP1    | Myelin proteolipid protein                                              | -0.172 | 0.015  | 0.061  | 0.277  | 0.056 | 0.159 | 0.193 | 0.171 | 12.11   | >100.00 | 81.64   | 27.41   | 0.016 | 0.928 | 0.743 | 0.144 | 7 | 6  | 7  | 6  | 5  |
| PLXA4_MOUSE  | PLXNA4  | Plexin-A4                                                               | -0.029 | 0.068  | -0.198 | -0.063 | 0.101 | 0.062 | 0.180 | 0.167 | 69.52   | 26.36   | 48.33   | >100.00 | 0.783 | 0.326 | 0.387 | 0.719 | 1 | 4  | 7  | 4  | 4  |
| PPIA_MOUSE   | PPIA    | Peptidyl-prolyl cis-trans isomerase A                                   | -0.130 | -0.288 | -0.253 | 0.050  | 0.061 | 0.072 | 0.265 | 0.211 | 38.56   | 0.00    | 48.33   | 56.85   | 0.070 | 0.004 | 0.370 | 0.817 | 6 | 9  | 7  | 8  | 4  |
| 2AAA_MOUSE   | PPP2R1A | alpha isoform                                                           | -0.131 | -0.130 | -0.043 | 0.196  | 0.078 | 0.107 | 0.066 | 0.153 | 48.32   | 35.97   | 72.70   | 33.94   | 0.139 | 0.258 | 0.551 | 0.239 | 5 | 5  | 3  | 3  | 5  |
| PP2BA_MOUSE  | PPP3CA  | Serine/threonine-protein phosphatase 2B catalytic subunit alpha isoform | 0.013  | -0.093 | -0.189 | 0.099  | 0.131 | 0.094 | 0.191 | 0.170 | 76.98   | 42.18   | 48.33   | 51.06   | 0.922 | 0.367 | 0.352 | 0.575 | 4 | 5  | 4  | 3  | 3  |
| CANB1_MOUSE  | PPP3R1  | Calcineurin subunit B type 1                                            | -0.053 | -0.011 | -0.129 | 0.218  | 0.106 | 0.065 | 0.232 | 0.186 | 66.90   | >100.00 | 62.19   | 33.94   | 0.637 | 0.864 | 0.616 | 0.276 | 3 | 4  | 4  | 3  | 4  |
| PRDX1_MOUSE  | PRDX1   | Peroxioredoxin-1                                                        | 0.062  | 0.090  | 0.145  | 0.335  | 0.054 | 0.072 | 0.071 | 0.053 | 50.10   | 21.11   | 77.57   | 0.00    | 0.286 | 0.256 | 0.075 | 0.002 | 6 | 7  | 5  | 5  | 6  |
| PRDX5_MOUSE  | Prdx5   | Peroxioredoxin-5                                                        | 0.056  | -0.593 | -0.382 | -0.399 | 0.070 | 0.044 | 0.149 | 0.139 | 58.94   | 0.00    | 48.33   | 0.00    | 0.448 | 0.906 | 0.044 | 0.021 | 4 | 6  | 6  | 4  | 4  |
| PRDX6_MOUSE  | PRDX6   | Peroxioredoxin-6                                                        | -0.013 | -0.027 | 0.012  | 0.254  | 0.077 | 0.098 | 0.123 | 0.097 | 69.52   | >100.00 | 84.42   | 21.42   | 0.871 | 0.790 | 0.925 | 0.038 | 4 | 6  | 5  | 4  | 4  |
| KAPCA_MOUSE  | PRKACA  | cAMP-dependent protein kinase catalytic subunit alpha                   | -0.109 | -0.096 | 0.041  | 0.177  | 0.099 | 0.081 | 0.164 | 0.109 | 53.96   | 40.16   | 84.42   | 33.94   | 0.316 | 0.273 | 0.818 | 0.146 | 1 | 3  | 3  | 3  | 1  |
| KAP3_MOUSE   | PRKAR2B | cAMP-dependent protein kinase type II-beta regulatory subunit           | -0.045 | -0.027 | 0.015  | 0.049  | 0.117 | 0.130 | 0.114 | 0.115 | 68.31   | >100.00 | 77.57   | 52.60   | 0.715 | 0.841 | 0.516 | 0.690 | 1 | 3  | 4  | 3  | 1  |
| KPCB_MOUSE   | PRKCB1  | Protein kinase C beta type                                              | 0.045  | 0.008  | 0.064  | 0.203  | 0.051 | 0.035 | 0.098 | 0.092 | 58.53   | >100.00 | 77.57   | 27.41   | 0.412 | 0.815 | 0.577 | 0.058 | 3 | 5  | 3  | 5  | 4  |
| KPCG_MOUSE   | PRKCG   | Protein kinase C gamma type                                             | -0.004 | -0.099 | 0.023  | -0.080 | 0.031 | 0.068 | 0.094 | 0.065 | 55.36   | 35.97   | 84.42   | 63.47   | 0.198 | 0.181 | 0.831 | 0.250 | 9 | 16 | 13 | 16 | 13 |
| PRIC_MOUSE   | PRN1    | Major prion protein                                                     | -0.060 | -0.015 | 0.014  | -0.217 | 0.061 | 0.111 | 0.113 | 0.129 | 62.80   | >100.00 | 84.42   | 22.80   | 0.355 | 0.896 | 0.908 | 0.144 | 5 | 5  | 5  | 3  | 3  |
| ESPL5_MOUSE  | PRRT2   | proline-rich transmembrane protein 2                                    | -0.063 | 0.230  | 0.153  | -0.238 | 0.081 | 0.077 | 0.091 | 0.116 | 66.90   | 0.00    | 77.57   | 15.71   | 0.459 | 0.002 | 0.164 | 0.106 | 3 | 3  | 2  | 3  | 1  |
| PYGB_MOUSE   | PYGB    | Glycogen phosphorylase, brain form                                      | 0.100  | -0.034 | -0.118 | 0.003  | 0.122 | 0.070 | 0.108 | 0.149 | 54.63   | >100.00 | 54.74   | >100.00 | 0.437 | 0.647 | 0.346 | 0.985 | 4 | 5  | 9  | 8  | 10 |
| RAB10_MOUSE  | RAB10   | Ras-related protein Rab-10                                              | -0.017 | 0.148  | -0.072 | 0.156  | 0.075 | 0.116 | 0.063 | 0.068 | 69.52   | 19.86   | 71.00   | 27.41   | 0.833 | 0.240 | 0.290 | 0.070 | 4 | 3  | 5  | 5  | 2  |
| RAB14_MOUSE  | RAB14   | Ras-related protein Rab-14                                              | -0.035 | 0.082  | 0.003  | 0.127  | 0.043 | 0.059 | 0.109 | 0.051 | 69.50   | 13.24   | 85.56   | 33.94   | 0.441 | 0.202 | 0.982 | 0.038 | 5 | 5  | 4  | 3  | 3  |
| RAB1A_MOUSE  | RAB1A   | Ras-related protein Rab-1A                                              | -0.103 | 0.034  | 0.002  | 0.191  | 0.088 | 0.108 | 0.084 | 0.068 | 53.37   | 40.16   | 85.56   | 21.15   | 0.301 | 0.760 | 0.981 | 0.023 | 2 | 4  | 4  | 5  | 2  |
| RAB1B_MOUSE  | RAB1B   | Ras-related protein Rab-1B                                              | -0.162 | -0.027 | -0.064 | 0.061  | 0.055 | 0.074 | 0.131 | 0.116 | 27.55   | >100.00 | 70.39   | 51.06   | 0.021 | 0.727 | 0.612 | 0.613 | 1 | 3  | 3  | 3  | 3  |
| RAB2A_MOUSE  | RAB2A   | Ras-related protein Rab-2A                                              | 0.020  | -0.102 | 0.016  | 0.036  | 0.039 | 0.041 | 0.071 | 0.053 | 73.92   | 19.86   | 84.42   | 52.60   | 0.622 | 0.040 | 0.837 | 0.519 | 5 | 7  | 7  | 7  | 6  |
| RAB35_MOUSE  | RAB35   | Ras-related protein Rab-35                                              | -0.023 | -0.051 | 0.141  | -0.201 | 0.049 | 0.118 | 0.234 | 0.138 | 68.31   | >100.00 | 77.57   | 30.51   | 0.649 | 0.684 | 0.615 | 0.189 | 2 | 4  | 3  | 3  | 3  |
| RAB3A_MOUSE  | RAB3A   | Ras-related protein Rab-3A                                              | -0.050 | -0.103 | 0.025  | 0.029  | 0.046 | 0.021 | 0.069 | 0.054 | 62.80   | 9.19    | 84.42   | 54.22   | 0.322 | 0.003 | 0.750 | 0.605 | 6 | 6  | 6  | 6  | 6  |
| RAB3C_MOUSE  | RAB3C   | Ras-related protein Rab-3C                                              | -0.074 | -0.149 | -0.009 | -0.174 | 0.064 | 0.083 | 0.072 | 0.048 | 55.36   | 14.05   | 85.93   | 11.02   | 0.288 | 0.119 | 0.906 | 0.015 | 4 | 4  | 5  | 6  | 6  |
| RAB7A_MOUSE  | RAB7A   | Ras-related protein Rab-7a                                              | 0.015  | 0.067  | 0.115  | 0.066  | 0.017 | 0.030 | 0.048 | 0.067 | 72.00   | 21.11   | 77.57   | 51.06   | 0.428 | 0.060 | 0.069 | 0.357 | 5 | 6  | 8  | 9  | 5  |
| RAC1_MOUSE   | RAC1    | Ras-related C3 botulinum toxin substrate 1                              | 0.078  | -0.329 | 0.244  | -0.594 | 0.104 | 0.134 | 0.184 | 0.149 | 58.94   | 2.48    | 77.57   | 0.00    | 0.474 | 0.040 | 0.271 | 0.011 | 2 | 4  | 3  | 3  | 4  |
| RALA_MOUSE   | RALA    | Ras-related protein Ral-A                                               | -0.078 | 0.088  | -0.087 | 0.235  | 0.080 | 0.077 | 0.113 | 0.100 | 51.02   | 22.38   | 70.88   | 21.15   | 0.360 | 0.307 | 0.443 | 0.064 | 3 | 3  | 1  | 4  | 4  |
| RAP2B_MOUSE  | RAP2B   | Ras-related protein Rap-2b                                              | 0.053  | -0.009 | 0.064  | 0.178  | 0.061 | 0.078 | 0.124 | 0.058 | 56.97   | >100.00 | 78.34   | 22.04   | 0.408 | 0.915 | 0.653 | 0.023 | 3 | 4  | 4  | 3  | 3  |
| RHOA_MOUSE   | RHOA    | Transforming protein RhoA                                               | -0.002 | -0.112 | -0.064 | 0.342  | 0.094 | 0.163 | 0.142 | 0.185 | >100.00 | 43.91   | 70.39   | 21.15   | 0.981 | 0.523 | 0.660 | 0.128 | 3 | 5  | 3  | 4  | 4  |
| RHOB_MOUSE   | RHOB    | Rho-related GTP-binding protein RhoB                                    | 0.021  | 0.123  | 0.089  | -0.077 | 0.072 | 0.089 | 0.110 | 0.113 | 76.88   | 19.86   | 77.57   | 65.26   | 0.779 | 0.213 | 0.484 | 0.521 | 4 | 4  | 3  | 2  | 3  |
| RP3A_MOUSE   | RPH3A   | Rabphilin-3A                                                            | -0.019 | -0.263 | 0.011  | -0.021 | 0.039 | 0.096 | 0.100 | 0.081 | 68.31   | 2.48    | 84.42   | >100.00 | 0.633 | 0.027 | 0.921 | 0.800 | 7 | 8  | 6  | 7  | 6  |
| RTN1_MOUSE   | RTN1    | Reticulon-1                                                             | -0.034 | -0.068 | -0.053 | -0.048 | 0.076 | 0.084 | 0.082 | 0.079 | 68.31   | 45.18   | 70.02   | >100.00 | 0.668 | 0.448 | 0.507 | 0.560 | 4 | 5  | 5  | 6  | 4  |
| SAM50_MOUSE  | SAMM50  | Sorting and assembly machinery component 50 homolog                     | 0.192  | 0.195  | -0.133 | -0.014 | 0.108 | 0.070 | 0.140 | 0.081 | 25.67   | 5.42    | 54.74   | >100.00 | 0.118 | 0.031 | 0.347 | 0.863 | 1 | 4  | 3  | 2  | 3  |
| C12E_MOUSE   | SCAF1   | UPF0822 protein C1orf126 homolog                                        | 0.066  | 0.230  | 0.054  | 0.161  | 0.062 | 0.056 | 0.136 | 0.070 | 32.80   | >100.00 | 81.64   | 27.41   | 0.145 | 0.004 | 0.709 | 0.069 | 2 | 5  | 5  | 5  | 4  |
| SCAM1_MOUSE  | SCAMP1  | Secretory carrier-associated membrane protein 1                         | -0.078 | 0.022  | -0.199 | -0.261 | 0.148 | 0.103 | 0.191 | 0.085 | 66.90   | >100.00 | 48.33   | 57.41   | 0.622 | 0.840 | 0.312 | 0.016 | 2 | 3  | 3  | 2  | 3  |
| B1AWNE_MOUSE | SCN2A1  | Sodium channel, voltage-gated, type II, alpha 1                         | 0.003  | 0.127  | 0.015  | 0.003  | 0.086 | 0.082 | 0.078 | 0.067 | >100.00 | 19.86   | 84.42   | >100.00 | 0.976 | 0.161 | 0.843 | 0.962 | 2 | 5  | 6  | 7  | 2  |
| DHSA_MOUSE   | SDHA    | Succinate dehydrogenase [ubiquinone] flavoprotein subunit               | 0.142  | -0.098 | -0.117 | -0.353 | 0.078 | 0.111 | 0.104 | 0.112 | 25.67   | 42.52   | 54.74   | 0.00    | 0.111 | 0.420 | 0.297 | 0.016 | 4 | 11 | 8  | 7  | 6  |
| DHSB_MOUSE   | SDHB    | Succinate dehydrogenase [ubiquinone] iron-sulfur subunit                | 0.155  | 0.187  | -0.051 | 0.165  | 0.096 | 0.082 | 0.135 | 0.129 | 33.15   |         |         |         |       |       |       |       |   |    |    |    |    |

|             |           |                                                     |        |        |        |        |       |       |       |       |       |         |         |         |       |       |       |       |    |    |    |    |    |
|-------------|-----------|-----------------------------------------------------|--------|--------|--------|--------|-------|-------|-------|-------|-------|---------|---------|---------|-------|-------|-------|-------|----|----|----|----|----|
| SPTB2_MOUSE | SPTBN1    | Spectrin beta chain, brain 1                        | -0.033 | -0.058 | 0.014  | -0.048 | 0.038 | 0.044 | 0.086 | 0.054 | 66.90 | 42.52   | 84.42   | 66.46   | 0.411 | 0.220 | 0.890 | 0.407 | 60 | 90 | 88 | 92 | 75 |
| SRCN1_MOUSE | SRCN1     | p130Cas-associated protein                          | -0.089 | -0.070 | 0.081  | 0.042  | 0.103 | 0.052 | 0.085 | 0.096 | 62.80 | 41.79   | 77.57   | 52.60   | 0.413 | 0.213 | 0.383 | 0.673 | 2  | 19 | 10 | 15 | 12 |
| STX1A_MOUSE | STX1A     | Syntaxin-1A                                         | -0.111 | -0.242 | 0.027  | -0.238 | 0.059 | 0.052 | 0.123 | 0.095 | 42.55 | 0.00    | 84.42   | 11.02   | 0.097 | 0.002 | 0.848 | 0.039 | 5  | 9  | 8  | 9  | 6  |
| STX1B_MOUSE | STX1B     | Syntaxin-1B                                         | -0.054 | -0.168 | 0.012  | -0.211 | 0.065 | 0.037 | 0.072 | 0.076 | 66.90 | 2.48    | 84.42   | 10.42   | 0.432 | 0.004 | 0.890 | 0.024 | 12 | 15 | 14 | 15 | 14 |
| STXB1_MOUSE | STXBP1    | Syntaxin-binding protein 1                          | -0.030 | -0.015 | 0.040  | -0.021 | 0.038 | 0.044 | 0.041 | 0.043 | 66.90 | >100.00 | 81.76   | >100.00 | 0.461 | 0.738 | 0.346 | 0.636 | 20 | 30 | 22 | 23 | 20 |
| SUCA_MOUSE  | SUCLG1    | Succinyl-CoA ligase [GDP-forming] subunit alpha     | 0.109  | -0.051 | 0.017  | -0.238 | 0.083 | 0.067 | 0.105 | 0.060 | 38.56 | 46.49   | 84.42   | 2.97    | 0.225 | 0.476 | 0.868 | 0.008 | 5  | 8  | 7  | 5  | 5  |
| SV2A_MOUSE  | SV2A      | Synaptic vesicle glycoprotein 2A                    | -0.011 | 0.050  | 0.090  | -0.154 | 0.055 | 0.061 | 0.093 | 0.028 | 69.52 | 33.34   | 77.57   | 10.15   | 0.852 | 0.439 | 0.367 | 0.001 | 6  | 13 | 11 | 13 | 9  |
| SV2B_MOUSE  | SV2B      | Synaptic vesicle glycoprotein 2B                    | -0.061 | 0.006  | 0.025  | -0.166 | 0.036 | 0.056 | 0.075 | 0.043 | 51.02 | >100.00 | 84.42   | 11.02   | 0.136 | 0.913 | 0.773 | 0.005 | 9  | 9  | 9  | 8  | 9  |
| SYN1_MOUSE  | SYN1      | Synapsin-1                                          | -0.085 | -0.365 | 0.000  | -0.499 | 0.042 | 0.030 | 0.081 | 0.093 | 42.55 | 0.00    | >100.00 | 0.00    | 0.102 | 2.084 | 0.996 | 0.001 | 15 | 18 | 19 | 18 | 17 |
| SYN2_MOUSE  | SYN2      | Synapsin-2                                          | -0.062 | -0.396 | -0.122 | -0.308 | 0.038 | 0.074 | 0.103 | 0.062 | 51.02 | 0.00    | 54.74   | 0.00    | 0.146 | 0.001 | 0.278 | 0.001 | 10 | 13 | 13 | 11 | 11 |
| SYNJ1_MOUSE | SYNJ1     | Synaptojanin-1                                      | -0.017 | -0.248 | 0.009  | -0.073 | 0.054 | 0.035 | 0.121 | 0.095 | 69.52 | 0.00    | 84.08   | 65.26   | 0.757 | 0.001 | 0.949 | 0.467 | 3  | 6  | 2  | 7  | 3  |
| SYNPR_MOUSE | SYNPR     | Synaptoporin                                        | -0.067 | 0.104  | 0.126  | 0.097  | 0.141 | 0.083 | 0.116 | 0.083 | 66.90 | 21.11   | 77.57   | 42.52   | 0.653 | 0.248 | 0.357 | 0.277 | 2  | 5  | 3  | 3  | 2  |
| SYPH_MOUSE  | SYP       | Synaptophysin                                       | -0.023 | -0.331 | 0.023  | -0.339 | 0.056 | 0.071 | 0.118 | 0.088 | 68.53 | 0.00    | 84.42   | 0.00    | 0.691 | 0.002 | 0.885 | 0.012 | 4  | 6  | 6  | 6  | 7  |
| SYT1_MOUSE  | SYT1      | Synaptotagmin-1                                     | -0.128 | 0.018  | 0.098  | -0.125 | 0.059 | 0.056 | 0.074 | 0.043 | 36.04 | >100.00 | 77.57   | 30.51   | 0.062 | 0.754 | 0.258 | 0.020 | 9  | 11 | 12 | 11 | 9  |
| THY1_MOUSE  | THY1      | Thy-1 membrane glycoprotein                         | -0.047 | -0.117 | -0.005 | -0.528 | 0.105 | 0.085 | 0.089 | 0.203 | 67.56 | 34.22   | >100.00 | 0.00    | 0.668 | 0.208 | 0.963 | 0.047 | 6  | 6  | 5  | 5  | 5  |
| TKT_MOUSE   | TKT       | Transketolase                                       | -0.134 | 0.084  | 0.053  | 0.207  | 0.083 | 0.056 | 0.102 | 0.074 | 50.18 | 21.11   | 81.64   | 21.15   | 0.144 | 0.190 | 0.598 | 0.027 | 4  | 8  | 8  | 6  | 8  |
| TENR_MOUSE  | TNR       | Tenascin-R                                          | -0.031 | 0.202  | 0.297  | -0.022 | 0.061 | 0.078 | 0.183 | 0.136 | 67.56 | 6.27    | 77.57   | >100.00 | 0.628 | 0.032 | 0.131 | 0.878 | 9  | 16 | 15 | 12 | 9  |
| TOM70_MOUSE | TOMM70A   | Mitochondrial import receptor subunit TOM70         | 0.191  | 0.014  | -0.061 | 0.177  | 0.103 | 0.058 | 0.101 | 0.108 | 25.67 | >100.00 | 70.39   | 33.94   | 0.101 | 0.811 | 0.563 | 0.137 | 5  | 10 | 7  | 9  | 8  |
| TPIS_MOUSE  | TP11      | Triosephosphate isomerase                           | -0.048 | -0.096 | -0.172 | 0.190  | 0.085 | 0.058 | 0.250 | 0.171 | 66.90 | 34.22   | 54.74   | 33.94   | 0.588 | 0.143 | 0.509 | 0.301 | 8  | 9  | 7  | 10 | 9  |
| TPPP_MOUSE  | TPPP      | Tubulin polymerization-promoting protein            | -0.062 | -0.100 | 0.021  | -0.290 | 0.073 | 0.072 | 0.106 | 0.069 | 66.90 | 36.56   | 84.42   | 0.00    | 0.423 | 0.205 | 0.850 | 0.005 | 6  | 9  | 6  | 9  | 6  |
| TTYH1_MOUSE | TTYH1     | Protein tweety homolog 1                            | 0.039  | 0.180  | 0.227  | 0.267  | 0.083 | 0.109 | 0.172 | 0.150 | 74.06 | 13.62   | 77.57   | 27.41   | 0.656 | 0.139 | 0.263 | 0.113 | 2  | 3  | 3  | 3  | 3  |
| TUBB3_MOUSE | TUBB3     | Tubulin beta-3 chain                                | -0.193 | -0.546 | -0.230 | -0.505 | 0.122 | 0.125 | 0.357 | 0.207 | 48.32 | 0.00    | 48.33   | 0.00    | 0.171 | 0.003 | 0.549 | 0.041 | 3  | 3  | 3  | 5  | 2  |
| UCHL1_MOUSE | UCHL1     | Ubiquitin carboxyl-terminal hydrolase isozyme L1    | -0.122 | -0.169 | -0.252 | 0.204  | 0.108 | 0.079 | 0.221 | 0.150 | 53.37 | 9.19    | 48.33   | 33.94   | 0.293 | 0.072 | 0.289 | 0.213 | 3  | 5  | 3  | 2  | 5  |
| QCR7_MOUSE  | QCRB      | Cytochrome b-c1 complex subunit 7                   | 0.193  | 0.067  | -0.191 | -0.097 | 0.098 | 0.104 | 0.198 | 0.146 | 25.67 | 33.34   | 48.33   | 65.26   | 0.086 | 0.547 | 0.390 | 0.527 | 5  | 9  | 7  | 7  | 6  |
| QCR1_MOUSE  | UQCRC1    | Cytochrome b-c1 complex subunit 1                   | 0.166  | 0.063  | -0.172 | -0.077 | 0.090 | 0.102 | 0.190 | 0.115 | 25.67 | 33.34   | 48.33   | 65.26   | 0.104 | 0.557 | 0.400 | 0.526 | 6  | 10 | 10 | 9  | 10 |
| QCR2_MOUSE  | UQCRC2    | Cytochrome b-c1 complex subunit 2                   | 0.167  | 0.105  | -0.192 | -0.041 | 0.087 | 0.099 | 0.173 | 0.130 | 25.67 | 21.11   | 48.33   | >100.00 | 0.090 | 0.327 | 0.340 | 0.767 | 9  | 14 | 13 | 15 | 14 |
| UCR1_MOUSE  | UQCRCF51  | Cytochrome b-c1 complex subunit Rieske              | 0.156  | 0.104  | -0.283 | 0.045  | 0.084 | 0.112 | 0.206 | 0.099 | 25.67 | 22.83   | 48.33   | 52.60   | 0.113 | 0.379 | 0.214 | 0.661 | 4  | 5  | 3  | 5  | 5  |
| TERA_MOUSE  | VCP       | Transitional endoplasmic reticulum ATPase           | 0.018  | -0.055 | 0.027  | -0.008 | 0.119 | 0.038 | 0.120 | 0.084 | 76.98 | 42.52   | 84.42   | >100.00 | 0.886 | 0.195 | 0.821 | 0.929 | 4  | 5  | 5  | 4  | 6  |
| VDAC1_MOUSE | VDAC1     | Voltage-dependent anion-selective channel protein 1 | 0.158  | 0.175  | -0.084 | 0.163  | 0.093 | 0.073 | 0.153 | 0.126 | 30.45 | 8.39    | 71.00   | 33.94   | 0.135 | 0.054 | 0.639 | 0.235 | 7  | 11 | 10 | 9  | 7  |
| VDAC2_MOUSE | VDAC2     | Voltage-dependent anion-selective channel protein 2 | 0.183  | -0.038 | -0.094 | 0.092  | 0.067 | 0.113 | 0.132 | 0.109 | 19.68 | >100.00 | 70.89   | 51.06   | 0.026 | 0.747 | 0.487 | 0.429 | 5  | 8  | 5  | 7  | 7  |
| VDAC3_MOUSE | VDAC3     | Voltage-dependent anion-selective channel protein 3 | 0.152  | 0.079  | -0.118 | -0.006 | 0.067 | 0.075 | 0.106 | 0.122 | 25.67 | 24.72   | 54.74   | >100.00 | 0.060 | 0.338 | 0.282 | 0.964 | 4  | 7  | 5  | 5  | 6  |
| VISL1_MOUSE | VSNL1     | Vesilin-like protein 1                              | 0.059  | -0.144 | -0.174 | -0.140 | 0.073 | 0.064 | 0.146 | 0.135 | 58.53 | 9.59    | 48.33   | 59.40   | 0.445 | 0.061 | 0.290 | 0.334 | 5  | 5  | 6  | 4  | 5  |
| 1433B_MOUSE | YWHAH     | 14-3-3 protein beta/alpha                           | -0.250 | -0.168 | 0.000  | 0.027  | 0.143 | 0.053 | 0.179 | 0.148 | 41.68 | 5.07    | >100.00 | >100.00 | 0.131 | 0.019 | 0.998 | 0.862 | 1  | 4  | 4  | 3  | 2  |
| 1433E_MOUSE | YWHAH     | 14-3-3 protein epsilon                              | 0.010  | -0.083 | -0.190 | 0.071  | 0.058 | 0.085 | 0.203 | 0.156 | 76.98 | 42.52   | 48.33   | 51.06   | 0.862 | 0.371 | 0.386 | 0.660 | 8  | 10 | 9  | 8  | 7  |
| 1433G_MOUSE | YWHAH     | 14-3-3 protein gamma                                | -0.254 | -0.076 | -0.147 | -0.013 | 0.077 | 0.082 | 0.223 | 0.159 | 14.31 | 43.44   | 54.74   | >100.00 | 0.013 | 0.382 | 0.520 | 0.935 | 4  | 5  | 6  | 8  | 5  |
| 1433F_MOUSE | YWHAH     | 14-3-3 protein eta                                  | 0.088  | -0.154 | -0.081 | 0.023  | 0.022 | 0.111 | 0.195 | 0.141 | 20.99 | 26.36   | 69.92   | >100.00 | 0.006 | 0.229 | 0.674 | 0.876 | 2  | 3  | 4  | 3  | 3  |
| 1433T_MOUSE | YWHAQ     | 14-3-3 protein theta                                | -0.189 | 0.001  | -0.145 | 0.280  | 0.069 | 0.100 | 0.170 | 0.122 | 27.55 | >100.00 | 54.74   | 21.42   | 0.042 | 0.991 | 0.443 | 0.072 | 1  | 4  | 2  | 3  | 3  |
| 1433Z_MOUSE | YWHAZ     | 14-3-3 protein zeta/delta                           | -0.028 | -0.091 | -0.270 | 0.182  | 0.062 | 0.070 | 0.227 | 0.169 | 68.31 | 40.16   | 48.33   | 33.94   | 0.666 | 0.242 | 0.295 | 0.315 | 6  | 7  | 8  | 10 | 8  |
| 148686951   | mCG145297 | mCG145297                                           | -0.142 | 0.078  | 0.172  | -0.046 | 0.142 | 0.126 | 0.090 | 0.163 | 55.48 | 33.34   | 77.57   | >100.00 | 0.360 | 0.560 | 0.085 | 0.788 | 2  | 4  | 4  | 5  | 2  |
| 148690766   | mCG5710   | mCG5710                                             | 0.009  | -0.085 | 0.073  | -0.069 | 0.066 | 0.047 | 0.102 | 0.082 | 76.98 | 35.97   | 77.57   | 65.26   | 0.893 | 0.106 | 0.485 | 0.432 | 2  | 5  | 4  | 5  | 6  |
