# Supplementary material for: Reducing hippocampal extracellular matrix reverses early memory deficits in a mouse model of Alzheimer’s disease
Source: Springer Nature journal article supplement (doi:10.1186/s40478-014-0076-z), 2014-06-28
Supplement: 40478_2014_76_MOESM5_ESM.pdf [file 40478_2014_76_MOESM5_ESM.pdf]

## **Reducing hippocampal extracellular matrix reverses early memory deficits in a mouse model of Alzheimer's disease**

**Marlene J. Végh<sup>a</sup>, Céline M. Heldring<sup>a</sup>, Willem Kamphuis<sup>b</sup>, Sara Hijazi<sup>a</sup>, Arie J. Timmerman<sup>a</sup>, Ka Wan Li<sup>a</sup>, Pim van Nierop<sup>a</sup>, Huibert D. Mansvelder<sup>a</sup>, Elly M. Hol<sup>c</sup>, August B. Smit<sup>a</sup>, Ronald E. van Kesteren<sup>a</sup>**

<sup>a</sup>Center for Neurogenomics and Cognitive Research, Neuroscience Campus Amsterdam, VU University, De Boelelaan 1085, 1081 HV Amsterdam, The Netherlands.

<sup>b</sup>Netherlands Institute for Neuroscience, Meibergdreef 47, 1105 BA Amsterdam, The Netherlands.

<sup>c</sup>Department of Translational Neuroscience, Brain Center Rudolf Magnus, University Medical Center Utrecht, Universiteitsweg 100, 3584 CG, Utrecht, The Netherlands.

Correspondence should be addressed to R.E. van Kesteren. E-mail: ronald.van.kesteren@vu.nl, phone: +31205987111, fax: +31205989281.

### **Supplementary Table 2**

**Suppl. Table 2** Functional enrichment of differentially expressed proteins at 3 months of age. Significantly enriched (Fisher's exact  $p$ -value <0.05) GO terms are listed. Enriched GO terms were assigned to two functional groups: extracellular matrix and presynaptic neurotransmitter release

| GO term                                                                    | Proteins                                                                                              | Fold enrichment | Fisher's exact $p$ -value |
|----------------------------------------------------------------------------|-------------------------------------------------------------------------------------------------------|-----------------|---------------------------|
| <b>Extracellular matrix (DAVID enrichment score: 1.30)</b>                 |                                                                                                       |                 |                           |
| GO:0031012~extracellular matrix                                            | HAPLN1, SLC1A3, TNR, BCAN, NCAN                                                                       | 4.4             | 0.0098                    |
| GO:0005578~proteinaceous extracellular matrix                              | HAPLN1, SLC1A3, TNR, BCAN, NCAN                                                                       | 4.4             | 0.0098                    |
| GO:0001871~pattern binding                                                 | NCAM1, HAPLN1, APP, BCAN, NCAN                                                                        | 3.7             | 0.0233                    |
| GO:0030247~polysaccharide binding                                          | NCAM1, HAPLN1, APP, BCAN, NCAN                                                                        | 3.7             | 0.0233                    |
| GO:0005539~glycosaminoglycan binding                                       | NCAM1, HAPLN1, APP, BCAN, NCAN                                                                        | 3.7             | 0.0233                    |
| GO:0005576~extracellular region                                            | HAPLN1, SLC1A3, PPIA, ADAM23, TNR, CFL1, BCAN, NCAN                                                   | 2.2             | 0.0434                    |
| <b>Presynaptic neurotransmitter release (DAVID enrichment score: 0.91)</b> |                                                                                                       |                 |                           |
| GO:0003001~generation of a signal involved in cell-cell signaling          | RAB3A, STX1A, SYN1, SYNJ1, SYN2, CACNB4, RPH3A, SNAP25                                                | 2.7             | 0.0120                    |
| GO:0007269~neurotransmitter secretion                                      | RAB3A, STX1A, SYN1, SYNJ1, SYN2, RPH3A, SNAP25                                                        | 2.8             | 0.0190                    |
| GO:0016192~vesicle-mediated transport                                      | RAB3A, STX1A, CLTB, NAPG, ICAM5, SYNJ1, NAPB, RPH3A, CLTC, STX1B, AMPH, SYP, PACSIN1, APP, ARF3, RAC1 | 1.7             | 0.0210                    |
