# Supplementary material for: Reducing hippocampal extracellular matrix reverses early memory deficits in a mouse model of Alzheimer’s disease
Source: Springer Nature journal article supplement (doi:10.1186/s40478-014-0076-z), 2014-06-28
Supplement: MOESM4 [file 25665532]

## Reducing hippocampal extracellular matrix reverses early memory deficits in a mouse model of Alzheimer's disease

Marlene J. Végh<sup>a</sup>, Céline M. Heldring<sup>a</sup>, Willem Kamphuis<sup>b</sup>, Sara Hijazi<sup>a</sup>, Arie J. Timmerman<sup>a</sup>, Ka Wan Li<sup>a</sup>, Pim van Nierop<sup>a</sup>, Huibert D. Mansvelder<sup>a</sup>, Elly M. Hol<sup>c</sup>, August B. Smit<sup>a</sup>, Ronald E. van Kesteren<sup>a</sup>

<sup>a</sup>Center for Neurogenomics and Cognitive Research, Neuroscience Campus Amsterdam, VU University, De Boelelaan 1085, 1081 HV Amsterdam, The Netherlands.

<sup>b</sup>Netherlands Institute for Neuroscience, Meibergdreef 47, 1105 BA Amsterdam, The Netherlands.

<sup>c</sup>Department of Translational Neuroscience, Brain Center Rudolf Magnus, University Medical Center Utrecht, Universiteitsweg 100, 3584 CG, Utrecht, The Netherlands.

Correspondence should be addressed to R.E. van Kesteren. E-mail: ronald.van.kesteren@vu.nl, phone: +31205987111, fax: +31205989281.

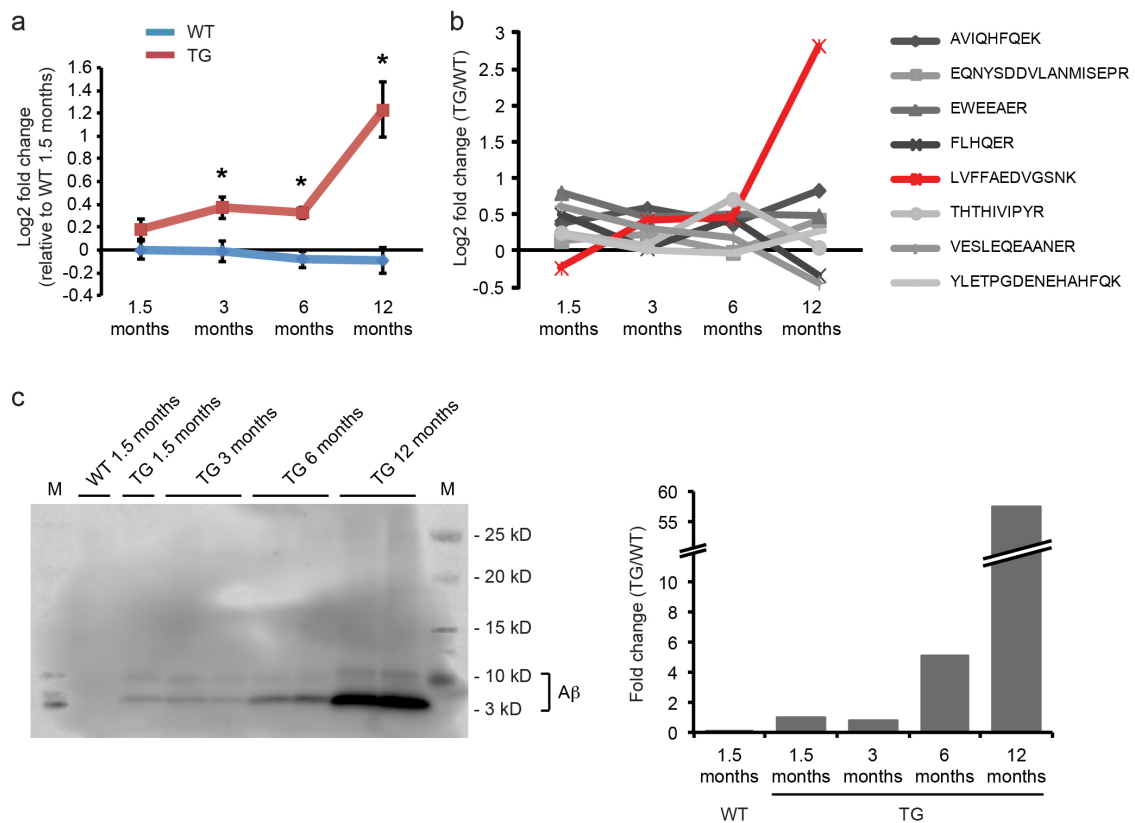

**Suppl. Fig. 2** APP/A $\beta$  levels at hippocampal synaptic sites are significantly increased in APP/PS1 mice. **a** Proteomics analysis revealed a significant increase in APP levels at hippocampal synaptic sites in APP/PS1 transgenic (TG) mice compared with wildtype (WT) controls at 3, 6 and 12 months of age;  $n = 5$  mice per genotype (SAM analysis; mean  $\pm$  SEM; \*FDR < 10). **b** Increased levels of APP as detected by proteomics analysis are primarily due to an increase in the levels of the A $\beta$ -specific peptide LVFFAEDVGSNK (indicated in red), in particular at 12 months of age. **c** The increase in synaptic A $\beta$  levels is further confirmed by immunoblotting using the A $\beta$ -specific antibody 6E10. An age-dependent accumulation of monomeric and low molecular weight oligomeric A $\beta$  is observed, starting as early as 1.5 months of age
